# Supplementary material for: Quantification of DNA methylation for carcinogenic risk estimation in patients with non-alcoholic steatohepatitis
Source: PubMed Central journal article supplement (PMC9724255; doi:10.1186/s13148-022-01379-4), 2022-12-05
Supplement: 13148_2022_1379_MOESM1_ESM.pdf [file 13148_2022_1379_MOESM1_ESM.pdf]

**Additional file 1: Supplementary Table S1** Clinicopathological characteristics of patients in the initial and validation cohorts.

(A) Initial cohort

| Parameters                        | Patient groups                               |                                                                                             |                                                     |
|-----------------------------------|----------------------------------------------|---------------------------------------------------------------------------------------------|-----------------------------------------------------|
|                                   | Patients with colorectal cancer (CRC) (n=36) | Patients with morbid obesity (n=91)                                                         | Patients with hepatocellular carcinoma (HCC) (n=22) |
| Subjected tissue samples          | Normal liver tissue (NLT) (n=36)             | Non-cancerous liver tissue (N) showing non-alcoholic steatohepatitis (NASH) (NASH-O) (n=91) | N showing NASH (NASH-W) (n=22) and HCC (T) (n=22)   |
| Clinicopathological features      |                                              |                                                                                             |                                                     |
| Age (years)                       | 61.50 ± 8.05                                 | 42.49 ± 10.17                                                                               | 71.23 ± 7.65                                        |
| Sex                               |                                              |                                                                                             |                                                     |
| Male                              | 27                                           | 41                                                                                          | 20                                                  |
| Female                            | 9                                            | 50                                                                                          | 2                                                   |
| Histological findings in N        |                                              |                                                                                             |                                                     |
| Steatosis <sup>a</sup>            |                                              |                                                                                             |                                                     |
| <5%                               | N/A                                          | 3                                                                                           | 0                                                   |
| 5-33%                             | N/A                                          | 55                                                                                          | 15                                                  |
| 33-66%                            | N/A                                          | 21                                                                                          | 6                                                   |
| >66%                              | N/A                                          | 11                                                                                          | 1                                                   |
| Lobular inflammation <sup>a</sup> |                                              |                                                                                             |                                                     |
| None                              | N/A                                          | 1                                                                                           | 0                                                   |
| <2 foci per 200 x field           | N/A                                          | 74                                                                                          | 17                                                  |
| 2-4 foci per 200 x field          | N/A                                          | 16                                                                                          | 5                                                   |
| >4 foci per 200 x field           | N/A                                          | 0                                                                                           | 0                                                   |
| Ballooning <sup>a</sup>           |                                              |                                                                                             |                                                     |
| None                              | N/A                                          | 1                                                                                           | 0                                                   |
| Few                               | N/A                                          | 88                                                                                          | 19                                                  |
| Many                              | N/A                                          | 2                                                                                           | 3                                                   |
| Fibrosis <sup>b</sup>             |                                              |                                                                                             |                                                     |
| 0                                 | N/A                                          | 3                                                                                           | 0                                                   |
| 1a                                | N/A                                          | 43                                                                                          | 5                                                   |
| 1b                                | N/A                                          | 6                                                                                           | 0                                                   |
| 1c                                | N/A                                          | 0                                                                                           | 0                                                   |
| 2                                 | N/A                                          | 22                                                                                          | 10                                                  |
| 3                                 | N/A                                          | 13                                                                                          | 5                                                   |
| 4                                 | N/A                                          | 4                                                                                           | 2                                                   |
| NASH stage <sup>b</sup>           |                                              |                                                                                             |                                                     |
| Grade 1                           | N/A                                          | 69                                                                                          | 17                                                  |
| Grade 2                           | N/A                                          | 18                                                                                          | 4                                                   |
| Grade 3                           | N/A                                          | 1                                                                                           | 1                                                   |
| Burned-out NASH                   | N/A                                          | 3                                                                                           | 0                                                   |
| HCCs                              |                                              |                                                                                             |                                                     |
| Tumor diameter (cm)               | N/A                                          | N/A                                                                                         | 5.46 ± 2.66                                         |
| Histological grade <sup>c</sup>   |                                              |                                                                                             |                                                     |
| Well differentiated               | N/A                                          | N/A                                                                                         | 3                                                   |
| Moderately differentiated         | N/A                                          | N/A                                                                                         | 14                                                  |
| Poorly differentiated             | N/A                                          | N/A                                                                                         | 5                                                   |
| TNM stage                         |                                              |                                                                                             |                                                     |
| I                                 | N/A                                          | N/A                                                                                         | 7                                                   |
| II                                | N/A                                          | N/A                                                                                         | 11                                                  |
| IIIA                              | N/A                                          | N/A                                                                                         | 2                                                   |
| IIIB                              | N/A                                          | N/A                                                                                         | 2                                                   |
| IVA                               | N/A                                          | N/A                                                                                         | 0                                                   |
| IVB                               | N/A                                          | N/A                                                                                         | 0                                                   |

(B) Validation cohort

| Parameters                        | Patient groups           |                                                           |               |                                |                            |
|-----------------------------------|--------------------------|-----------------------------------------------------------|---------------|--------------------------------|----------------------------|
|                                   | Patients with CRC (n=34) |                                                           |               | Patients with HCC (n=21)       |                            |
| Subjected tissue samples          | NLT (n=22)               | N showing non-alcoholic fatty liver (NAFL) (NAFL-O) (n=9) | NASH-O (n=3)  | N showing NAFL (NAFL-W) (n=10) | NASH-W (n=11) and T (n=11) |
| Clinicopathological features      |                          |                                                           |               |                                |                            |
| Age (years)                       | 58.77 ± 12.23            | 63.78 ± 11.72                                             | 60.33 ± 11.72 | 69.00 ± 10.66                  | 70.36 ± 8.78               |
| Sex                               |                          |                                                           |               |                                |                            |
| Male                              | 13                       | 7                                                         | 2             | 8                              | 8                          |
| Female                            | 9                        | 2                                                         | 1             | 2                              | 3                          |
| Histological findings in N        |                          |                                                           |               |                                |                            |
| Steatosis <sup>a</sup>            |                          |                                                           |               |                                |                            |
| <5%                               | N/A                      | 0                                                         | 0             | 0                              | 0                          |
| 5-33%                             | N/A                      | 9                                                         | 2             | 10                             | 6                          |
| 33-66%                            | N/A                      | 0                                                         | 1             | 0                              | 4                          |
| >66%                              | N/A                      | 0                                                         | 0             | 0                              | 1                          |
| Lobular inflammation <sup>a</sup> |                          |                                                           |               |                                |                            |
| None                              | N/A                      | 7                                                         | 0             | 8                              | 0                          |
| <2 foci per 200 x field           | N/A                      | 2                                                         | 0             | 0                              | 4                          |
| 2-4 foci per 200 x field          | N/A                      | 0                                                         | 3             | 2                              | 7                          |
| >4 foci per 200 x field           | N/A                      | 0                                                         | 0             | 0                              | 0                          |
| Ballooning <sup>a</sup>           |                          |                                                           |               |                                |                            |
| None                              | N/A                      | 9                                                         | 0             | 10                             | 0                          |
| Few                               | N/A                      | 0                                                         | 3             | 0                              | 11                         |
| Many                              | N/A                      | 0                                                         | 0             | 0                              | 0                          |
| Fibrosis <sup>b</sup>             |                          |                                                           |               |                                |                            |
| 0                                 | N/A                      | 6                                                         | 0             | 1                              | 0                          |
| 1a                                | N/A                      | 2                                                         | 1             | 0                              | 3                          |
| 1b                                | N/A                      | 0                                                         | 1             | 0                              | 1                          |
| 1c                                | N/A                      | 1                                                         | 0             | 5                              | 0                          |
| 2                                 | N/A                      | 0                                                         | 1             | 2                              | 0                          |
| 3                                 | N/A                      | 0                                                         | 0             | 2                              | 7                          |
| 4                                 | N/A                      | 0                                                         | 0             | 0                              | 0                          |
| NASH stage <sup>b</sup>           |                          |                                                           |               |                                |                            |
| Grade 1                           | N/A                      | N/A                                                       | 1             | NA                             | 4                          |
| Grade 2                           | N/A                      | N/A                                                       | 2             | NA                             | 7                          |
| Grade 3                           | N/A                      | N/A                                                       | 0             | NA                             | 0                          |
| Burned-out NASH                   | N/A                      | N/A                                                       | 0             | NA                             | 0                          |
| HCCs                              |                          |                                                           |               |                                |                            |
| Tumor diameter (cm)               | N/A                      | N/A                                                       | N/A           | 7.14 ± 4.64                    | 5.76 ± 2.95                |
| Histological grade <sup>c</sup>   |                          |                                                           |               |                                |                            |
| Well differentiated               | N/A                      | N/A                                                       | N/A           | 2                              | 3                          |
| Moderately differentiated         | N/A                      | N/A                                                       | N/A           | 7                              | 7                          |
| Poorly differentiated             | N/A                      | N/A                                                       | N/A           | 1                              | 1                          |
| TNM stage                         |                          |                                                           |               |                                |                            |
| I                                 | N/A                      | N/A                                                       | N/A           | 0                              | 0                          |
| II                                | N/A                      | N/A                                                       | N/A           | 8                              | 4                          |
| IIIA                              | N/A                      | N/A                                                       | N/A           | 2                              | 6                          |
| IIIB                              | N/A                      | N/A                                                       | N/A           | 0                              | 0                          |
| IVA                               | N/A                      | N/A                                                       | N/A           | 0                              | 1                          |
| IVB                               | N/A                      | N/A                                                       | N/A           | 0                              | 0                          |

<sup>a</sup>Microscopic features (steatosis, lobular inflammation, ballooning and fibrosis) were evaluated according to the non-alcoholic fatty disease (NAFLD) activity score (Ref. 26). <sup>b</sup>NASH stage was defined according to the Brunt classification (Ref. 27). <sup>c</sup>Histological grade of HCCs was in accordance with the World Health Organization classification (Ref. 28). <sup>d</sup>TNM stage was defined according to the Union for International Cancer Control Tumor-Node-Metastasis classification (Ref. 29). N/A, not applicable.

**Additional file 2: Supplementary Table S2** Primer sequences and PCR products for high-performance liquid chromatography.

| PCR product ID | Probe ID <sup>a</sup> | Gene symbol | PCR primers (5'-3')         |                               | Target sequence (5'-3') <sup>b</sup>                                                                                                                                                                                                                                                                                                                                                                                                                                                                                        |
|----------------|-----------------------|-------------|-----------------------------|-------------------------------|-----------------------------------------------------------------------------------------------------------------------------------------------------------------------------------------------------------------------------------------------------------------------------------------------------------------------------------------------------------------------------------------------------------------------------------------------------------------------------------------------------------------------------|
|                |                       |             | Forward                     | Reverse                       |                                                                                                                                                                                                                                                                                                                                                                                                                                                                                                                             |
| 1              | cg09580822            | N/A         | GGAAGTTGATTTGATGGGTAGTA     | TCCAAAATAACTAATAAAAAACATCC    | GGAAGTTGATTTGATGGGCAGCACCGACCAAACCA <b>C</b> GACTTATGAGGCTTGAGATGCATGTGAGAATTAGGC<br>TGCTATGAAAT <b>ACGGCG</b> TGATCTGTTCCACCTTCTGTAAGTTTCTCAGAAGTGAGGACTCTACTCTCAGAAACA<br><b>GCG</b> TCCCTCCCTGCCACAGCCATCAATGTGCATGTGGT <b>CGACACACCG</b> CATTACACACACT <b>CAGCG</b> GCTCATTAAA<br>ATG <b>CG</b> TTGTGAACTTGG <b>CG</b> TAATCCCCAGGATGTTTCTTCATTAGCTATTTTGG                                                                                                                                                              |
| 2              | cg15050398            | LOC401242   | AAGTGTTTTTTTGTAGGAGGG       | TAAACTCCAAACTAAAACCTCTACC     | AAGTGTTCCTTCGTAGGAGGG <b>CG</b> TAGGCAGCCATGG <b>CG</b> CCCAGCAGGAATGGCATGATGTTGAAGCCCCA<br>CTTCCACAAGGACTGGCAGCAG <b>CG</b> TGTGGCC <b>CG</b> TGGTTCAACCAGAAGAT <b>CG</b> CAGAATCAAGGCC <b>CG</b> GCA<br>AGCCAAAGGG <b>CG</b> TGCAT <b>CG</b> CCC <b>CGCG</b> CC <b>CG</b> GAGAGT <b>CG</b> GGACCCATCTGGCCATTGTGCTGTGCCCTGCT<br>GT <b>CG</b> TTATCACATCAAGGTG <b>CGCG</b> CC <b>CG</b> CAGAGGCTTACGCTGGAGCTCA                                                                                                              |
| 3              | cg18210511            | ZC3H3       | GGTAGGTAGGATTTGATTAGTGTTT   | CTAAAATCTAATCAAACCTATTATCCCCA | GGCAGGCAGGATCTGACCAGTGTTC <b>CG</b> TGTGCTCACACTGGCACCC <b>CG</b> TGGGAAGGACAGG <b>CGAGCG</b> TGCC<br><b>CG</b> TGCTGTG <b>CG</b> TGCACATG <b>CG</b> CCACAG <b>CG</b> GCCCACACAGCAGC <b>CG</b> GGGCAAG <b>CG</b> GCC <b>CG</b> CCTCACCTTT<br>CACAG <b>CG</b> CAGGCCCC <b>CG</b> TTTTCAGGCCACTGGGACAACAGCCTGACCAGACCCAG                                                                                                                                                                                                      |
| 4              | cg09580859            | ZC3H3       | GGTAAGATGAGTTTATGTGTTTTGA   | TAAAATCTAATCAAACCTATTATCCCCA  | GGTAAGATGAGCTCATGTGTCTTAAAG <b>CG</b> CAAAGGTTAAAAATGAGTAAGCCTTGATTCTCT <b>CG</b> TTACCCAG<br>GCCTGAGCACCCACATCACAG <b>CG</b> CAGAAA <b>CG</b> GAGGCTCAGGCTGCC <b>CG</b> GAGGCAAGCCCCAAG <b>CG</b> GCAG<br>GCAGGATCTGACCAGTGTTC <b>CG</b> TGTGCTCACACTGGCACCC <b>CG</b> TGGGAAGGACAGG <b>CGAGCG</b> TG <b>CG</b> TGCT<br>GTGTG <b>CG</b> TGCACATG <b>CG</b> CCACAG <b>CG</b> GCCCACACAGCAGC <b>CG</b> GGGCAAG <b>CG</b> GCC <b>CG</b> CCTCACCTTTACAG<br><b>CG</b> CAGGCCCC <b>CG</b> TTTTCAGGCCACTGGGACAACAGCCTGACCAGACCCCA |
| 5              | cg13719443            | LOC285847   | GTTTAGGGTAGGGTAATTTTTTTTTAG | CCAAACAATACTATTAATAAATCCTCTAC | GTTTAGGGTAGGGTAATTTCCCTTAGCTTCTATG <b>CG</b> CACAAGTGCTGGCC <b>CG</b> CTGCAG <b>CG</b> TCAACCT <b>CG</b> GG<br>AATGG <b>CG</b> GTGCTTTT <b>CG</b> TAGAGGACCCCAACAGTATCTGTCTGG                                                                                                                                                                                                                                                                                                                                               |

<sup>a</sup>Probe ID of the Infinium HumanMethylation450 BeadChip.

<sup>b</sup>Infinium probe CpG sites are shown in bold and all CpG sites in target sequences are underlined.

N/A, not annotated (designed in the intergenic regions).

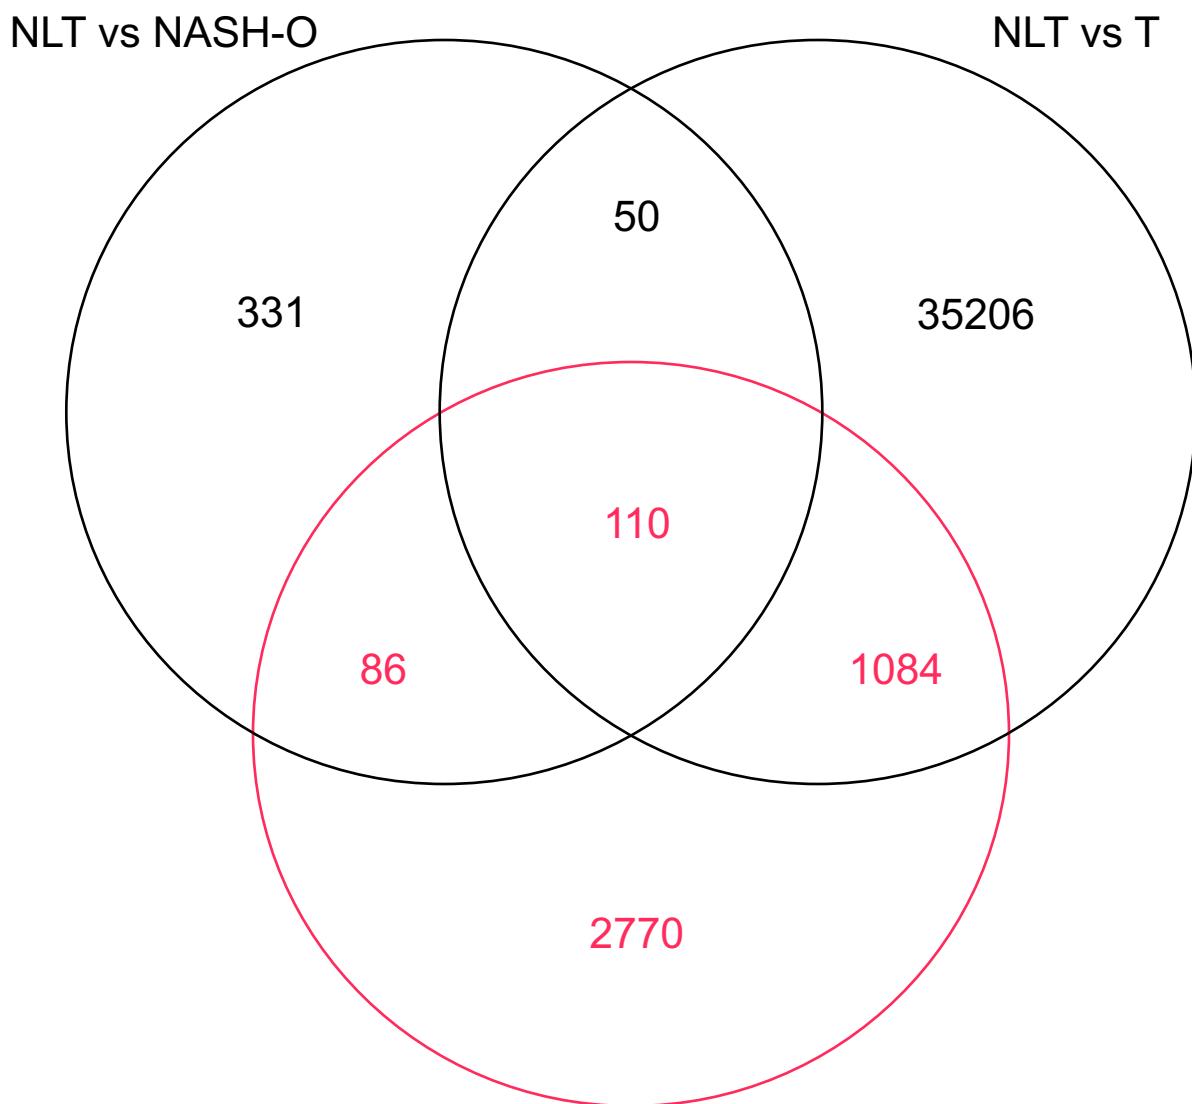

NLT vs NASH-W → 4050 probes in total were subjected to the Jonckheere-Terpstra trend test (Figure 1).

**Additional file 3: Supplementary Figure S1** Venn diagram showing the numbers of common and individual differentially methylated probes ( $P < 0.05$  after Bonferroni correction and  $|\Delta\beta| \geq 0.1$ ) based on the Infinium assay among samples of normal liver tissue (NLT), non-cancerous liver tissue showing non-alcoholic steatohepatitis (NASH) from partial hepatectomy specimens from patients without hepatocellular carcinoma (HCC) (NASH-O), non-cancerous liver tissue showing NASH from partial hepatectomy specimens from patients with HCC (NASH-W) and cancerous tissue (T).

**Additional file 4: Supplementary Table S3** The 415 CpG sites for which receiver operating characteristic curve analysis showed area under the curve (AUC) values larger than 0.95 for discrimination of non-cancerous liver tissue showing non-alcoholic steatohepatitis (NASH) derived from partial hepatectomy specimens from patients with hepatocellular carcinoma (NASH-W) from normal liver tissue (NLT) samples.

| Probe ID <sup>a</sup> | Gene symbol <sup>b</sup> | AUC   | Cutoff value <sup>c</sup> | <i>P</i> value         | Sensitivity <sup>d</sup> | Specificity <sup>e</sup> | DNA methylation status <sup>f</sup> |
|-----------------------|--------------------------|-------|---------------------------|------------------------|--------------------------|--------------------------|-------------------------------------|
| cg18457818            | <i>RAN</i>               | 0.994 | 0.597                     | 3.27x10 <sup>-7</sup>  | 0.972                    | 0.955                    | NLT < NASH-W                        |
| cg19349861            | <i>OPCML</i>             | 0.992 | 0.157                     | 2.57x10 <sup>-12</sup> | 1                        | 0.909                    | NLT < NASH-W                        |
| cg07724654            | <i>N/A</i>               | 0.99  | 0.841                     | 1.26x10 <sup>-7</sup>  | 0.944                    | 0.955                    | NLT < NASH-W                        |
| cg14427382            | <i>PPP1R2P1</i>          | 0.99  | 0.654                     | 8.75x10 <sup>-10</sup> | 0.917                    | 1                        | NLT > NASH-W                        |
| cg21980338            | <i>ZNF141</i>            | 0.99  | 0.3                       | 1.44x10 <sup>-9</sup>  | 0.944                    | 1                        | NLT < NASH-W                        |
| cg24147392            | <i>LOC440461</i>         | 0.99  | 0.306                     | 4.11x10 <sup>-4</sup>  | 0.944                    | 0.955                    | NLT < NASH-W                        |
| cg03505117            | <i>N/A</i>               | 0.987 | 0.128                     | 3.61x10 <sup>-2</sup>  | 0.944                    | 0.955                    | NLT < NASH-W                        |
| cg15606745            | <i>CACNG2</i>            | 0.987 | 0.609                     | 1.17x10 <sup>-8</sup>  | 0.944                    | 0.955                    | NLT > NASH-W                        |
| cg16319310            | <i>N/A</i>               | 0.987 | 0.606                     | 8.55x10 <sup>-11</sup> | 1                        | 0.909                    | NLT > NASH-W                        |
| cg03571507            | <i>ZNF611</i>            | 0.986 | 0.719                     | 2.56x10 <sup>-6</sup>  | 0.944                    | 0.955                    | NLT > NASH-W                        |
| cg12424965            | <i>EXOC2</i>             | 0.986 | 0.857                     | 4.43x10 <sup>-4</sup>  | 0.972                    | 0.955                    | NLT < NASH-W                        |
| cg14381908            | <i>RASGEF1A</i>          | 0.986 | 0.296                     | 2.21x10 <sup>-7</sup>  | 0.889                    | 1                        | NLT < NASH-W                        |
| cg25824760            | <i>ANKRD30B</i>          | 0.986 | 0.264                     | 5.18x10 <sup>-14</sup> | 0.889                    | 1                        | NLT < NASH-W                        |
| cg20426671            | <i>PITPNA</i>            | 0.985 | 0.496                     | 8.97x10 <sup>-11</sup> | 0.944                    | 1                        | NLT < NASH-W                        |
| cg14299696            | <i>N/A</i>               | 0.984 | 0.799                     | 3.43x10 <sup>-9</sup>  | 0.914                    | 1                        | NLT < NASH-W                        |
| cg12074375            | <i>N/A</i>               | 0.984 | 0.806                     | 1.09x10 <sup>-6</sup>  | 0.972                    | 0.909                    | NLT > NASH-W                        |
| cg21152376            | <i>N/A</i>               | 0.984 | 0.313                     | 1.00x10 <sup>-2</sup>  | 0.917                    | 1                        | NLT < NASH-W                        |
| cg25987208            | <i>N/A</i>               | 0.983 | 0.271                     | 7.30x10 <sup>-5</sup>  | 0.972                    | 0.905                    | NLT < NASH-W                        |
| cg07076175            | <i>FAM150A</i>           | 0.982 | 0.263                     | 1.94x10 <sup>-2</sup>  | 0.944                    | 1                        | NLT < NASH-W                        |
| cg07738077            | <i>ZNF28</i>             | 0.982 | 0.601                     | 6.17x10 <sup>-11</sup> | 0.917                    | 1                        | NLT > NASH-W                        |
| cg07886142            | <i>MEGF10</i>            | 0.982 | 0.694                     | 7.85x10 <sup>-8</sup>  | 0.917                    | 0.955                    | NLT > NASH-W                        |
| cg11070069            | <i>N/A</i>               | 0.982 | 0.183                     | 1.14x10 <sup>-2</sup>  | 0.917                    | 1                        | NLT < NASH-W                        |
| cg11213199            | <i>MRPS24</i>            | 0.982 | 0.426                     | 6.98x10 <sup>-13</sup> | 0.861                    | 1                        | NLT < NASH-W                        |
| cg12809925            | <i>PARK7</i>             | 0.982 | 0.31                      | 3.06x10 <sup>-5</sup>  | 1                        | 0.909                    | NLT < NASH-W                        |
| cg22083325            | <i>LOC440461</i>         | 0.982 | 0.245                     | 2.61x10 <sup>-4</sup>  | 1                        | 0.864                    | NLT < NASH-W                        |
| cg07138452            | <i>FLCN</i>              | 0.981 | 0.203                     | 2.65x10 <sup>-9</sup>  | 0.944                    | 0.909                    | NLT < NASH-W                        |
| cg07956857            | <i>N/A</i>               | 0.981 | 0.673                     | 1.03x10 <sup>-10</sup> | 0.972                    | 0.909                    | NLT > NASH-W                        |
| cg07959490            | <i>CCDC57</i>            | 0.981 | 0.532                     | 1.67x10 <sup>-9</sup>  | 0.917                    | 0.955                    | NLT < NASH-W                        |
| cg13161852            | <i>N/A</i>               | 0.981 | 0.761                     | 2.39x10 <sup>-10</sup> | 0.972                    | 0.909                    | NLT > NASH-W                        |
| cg13468249            | <i>DULLARD</i>           | 0.981 | 0.265                     | 6.04x10 <sup>-10</sup> | 0.917                    | 0.955                    | NLT < NASH-W                        |
| cg20251199            | <i>SNORA14B</i>          | 0.981 | 0.264                     | 1.41x10 <sup>-11</sup> | 1                        | 0.909                    | NLT < NASH-W                        |
| cg03666506            | <i>TBC1D26</i>           | 0.98  | 0.654                     | 1.71x10 <sup>-3</sup>  | 0.972                    | 0.909                    | NLT > NASH-W                        |
| cg08081407            | <i>ARF4</i>              | 0.98  | 0.213                     | 2.22x10 <sup>-11</sup> | 0.889                    | 0.955                    | NLT < NASH-W                        |
| cg11036936            | <i>RAD51L1</i>           | 0.98  | 0.646                     | 3.21x10 <sup>-9</sup>  | 0.917                    | 0.955                    | NLT > NASH-W                        |
| cg18855143            | <i>LCE2B</i>             | 0.98  | 0.681                     | 4.09x10 <sup>-2</sup>  | 0.972                    | 0.909                    | NLT > NASH-W                        |
| cg21407906            | <i>C20orf20</i>          | 0.98  | 0.256                     | 1.46x10 <sup>-10</sup> | 0.944                    | 1                        | NLT < NASH-W                        |
| cg25512188            | <i>RPS6KA2</i>           | 0.98  | 0.83                      | 2.29x10 <sup>-5</sup>  | 0.972                    | 0.909                    | NLT > NASH-W                        |
| cg01160882            | <i>DKK1</i>              | 0.979 | 0.153                     | 6.65x10 <sup>-6</sup>  | 0.861                    | 1                        | NLT < NASH-W                        |
| cg16282892            | <i>N/A</i>               | 0.979 | 0.625                     | 7.62x10 <sup>-7</sup>  | 0.889                    | 0.955                    | NLT > NASH-W                        |
| cg19003337            | <i>KRT17</i>             | 0.979 | 0.714                     | 7.75x10 <sup>-8</sup>  | 0.944                    | 0.955                    | NLT > NASH-W                        |
| cg20592700            | <i>WIPI2</i>             | 0.979 | 0.327                     | 7.16x10 <sup>-10</sup> | 0.889                    | 0.955                    | NLT < NASH-W                        |
| cg23481024            | <i>N/A</i>               | 0.979 | 0.61                      | 1.39x10 <sup>-19</sup> | 0.889                    | 0.955                    | NLT > NASH-W                        |
| cg14100946            | <i>CDK6</i>              | 0.978 | 0.457                     | 2.03x10 <sup>-5</sup>  | 0.971                    | 0.909                    | NLT < NASH-W                        |
| cg10328259            | <i>TSSC1</i>             | 0.977 | 0.738                     | 6.60x10 <sup>-11</sup> | 0.944                    | 0.909                    | NLT > NASH-W                        |
| cg14648311            | <i>N/A</i>               | 0.977 | 0.769                     | 4.43x10 <sup>-10</sup> | 0.889                    | 0.955                    | NLT > NASH-W                        |
| cg20464143            | <i>MYO10</i>             | 0.977 | 0.494                     | 4.09x10 <sup>-8</sup>  | 1                        | 0.864                    | NLT > NASH-W                        |
| cg02051077            | <i>PODXL</i>             | 0.976 | 0.315                     | 3.35x10 <sup>-3</sup>  | 1                        | 0.864                    | NLT < NASH-W                        |
| cg05478392            | <i>N/A</i>               | 0.976 | 0.426                     | 1.38x10 <sup>-6</sup>  | 0.861                    | 1                        | NLT < NASH-W                        |
| cg06361278            | <i>N/A</i>               | 0.976 | 0.265                     | 3.40x10 <sup>-9</sup>  | 1                        | 0.818                    | NLT < NASH-W                        |
| cg10162914            | <i>MFAP3L</i>            | 0.976 | 0.661                     | 4.75x10 <sup>-8</sup>  | 0.944                    | 0.909                    | NLT < NASH-W                        |
| cg15064753            | <i>ZNF662</i>            | 0.976 | 0.664                     | 7.04x10 <sup>-8</sup>  | 0.833                    | 1                        | NLT > NASH-W                        |
| cg15284457            | <i>N/A</i>               | 0.976 | 0.782                     | 1.79x10 <sup>-5</sup>  | 0.972                    | 0.955                    | NLT < NASH-W                        |
| cg15646741            | <i>N/A</i>               | 0.976 | 0.457                     | 2.31x10 <sup>-7</sup>  | 0.972                    | 0.909                    | NLT > NASH-W                        |

|            |             |       |       |                        |       |       |              |
|------------|-------------|-------|-------|------------------------|-------|-------|--------------|
| cg15920791 | N/A         | 0.976 | 0.313 | 1.11x10 <sup>-6</sup>  | 0.972 | 0.909 | NLT < NASH-W |
| cg18159180 | CUL7        | 0.976 | 0.434 | 3.38x10 <sup>-8</sup>  | 0.861 | 1     | NLT < NASH-W |
| cg20326359 | SNORD114-23 | 0.976 | 0.823 | 3.38x10 <sup>-4</sup>  | 0.944 | 0.909 | NLT > NASH-W |
| cg22216431 | NRIP2       | 0.976 | 0.505 | 1.31x10 <sup>-8</sup>  | 0.944 | 0.955 | NLT > NASH-W |
| cg22793065 | PCDHB4      | 0.976 | 0.325 | 2.60x10 <sup>-5</sup>  | 0.944 | 0.909 | NLT < NASH-W |
| cg02073839 | KIF25       | 0.975 | 0.749 | 1.74x10 <sup>-4</sup>  | 0.972 | 0.909 | NLT > NASH-W |
| cg03468541 | ZC3H14      | 0.975 | 0.164 | 3.29x10 <sup>-7</sup>  | 0.972 | 0.864 | NLT < NASH-W |
| cg04449562 | MYT1L       | 0.975 | 0.73  | 2.35x10 <sup>-2</sup>  | 0.889 | 1     | NLT > NASH-W |
| cg04867257 | N/A         | 0.975 | 0.493 | 1.48x10 <sup>-6</sup>  | 0.972 | 0.909 | NLT > NASH-W |
| cg05707844 | EIF2AK2     | 0.975 | 0.25  | 4.80x10 <sup>-9</sup>  | 0.972 | 0.864 | NLT < NASH-W |
| cg08941173 | PKNOX2      | 0.975 | 0.356 | 2.25x10 <sup>-10</sup> | 0.889 | 1     | NLT < NASH-W |
| cg15936935 | PACS2       | 0.975 | 0.611 | 5.70x10 <sup>-7</sup>  | 0.889 | 1     | NLT > NASH-W |
| cg19105961 | CYB5D2      | 0.975 | 0.332 | 9.24x10 <sup>-10</sup> | 0.889 | 0.955 | NLT < NASH-W |
| cg15470736 | UBE3C       | 0.974 | 0.788 | 6.74x10 <sup>-9</sup>  | 1     | 0.905 | NLT > NASH-W |
| cg00112042 | N/A         | 0.973 | 0.192 | 1.22x10 <sup>-7</sup>  | 0.889 | 0.955 | NLT < NASH-W |
| cg01593421 | N/A         | 0.973 | 0.574 | 5.08x10 <sup>-10</sup> | 0.833 | 1     | NLT > NASH-W |
| cg03000596 | LAT2        | 0.973 | 0.63  | 4.18x10 <sup>-8</sup>  | 0.917 | 0.955 | NLT > NASH-W |
| cg03022552 | ZNF431      | 0.973 | 0.781 | 2.60x10 <sup>-7</sup>  | 0.861 | 1     | NLT > NASH-W |
| cg08912801 | N/A         | 0.973 | 0.603 | 2.44x10 <sup>-5</sup>  | 0.972 | 0.909 | NLT > NASH-W |
| cg09580822 | N/A         | 0.973 | 0.682 | 2.01x10 <sup>-3</sup>  | 0.944 | 0.909 | NLT > NASH-W |
| cg10526795 | H6PD        | 0.973 | 0.68  | 4.39x10 <sup>-10</sup> | 0.861 | 1     | NLT > NASH-W |
| cg10824722 | N/A         | 0.973 | 0.661 | 2.36x10 <sup>-8</sup>  | 0.889 | 0.955 | NLT > NASH-W |
| cg12227411 | SNORD115-15 | 0.973 | 0.682 | 9.36x10 <sup>-7</sup>  | 0.889 | 0.955 | NLT > NASH-W |
| cg13178295 | N/A         | 0.973 | 0.309 | 3.67x10 <sup>-3</sup>  | 0.889 | 0.955 | NLT < NASH-W |
| cg13195185 | TNFRSF13B   | 0.973 | 0.638 | 1.53x10 <sup>-10</sup> | 0.917 | 0.955 | NLT > NASH-W |
| cg18185028 | DHX36       | 0.973 | 0.311 | 1.43x10 <sup>-8</sup>  | 0.889 | 0.955 | NLT < NASH-W |
| cg24469923 | ZNF440      | 0.973 | 0.094 | 1.07x10 <sup>-6</sup>  | 0.889 | 1     | NLT < NASH-W |
| cg27248073 | FAM64A      | 0.973 | 0.361 | 1.41x10 <sup>-9</sup>  | 0.917 | 0.909 | NLT < NASH-W |
| cg00254681 | PRRT1       | 0.972 | 0.205 | 1.39x10 <sup>-7</sup>  | 0.889 | 0.955 | NLT < NASH-W |
| cg01073178 | TESC        | 0.972 | 0.172 | 4.20x10 <sup>-11</sup> | 0.889 | 1     | NLT < NASH-W |
| cg01684248 | N/A         | 0.972 | 0.414 | 1.59x10 <sup>-10</sup> | 0.944 | 0.909 | NLT < NASH-W |
| cg04294971 | RFNG        | 0.972 | 0.299 | 1.57x10 <sup>-3</sup>  | 0.833 | 1     | NLT < NASH-W |
| cg12313158 | GRM4        | 0.972 | 0.574 | 4.83x10 <sup>-8</sup>  | 0.917 | 0.955 | NLT > NASH-W |
| cg14497545 | MAML3       | 0.972 | 0.604 | 9.04x10 <sup>-11</sup> | 0.889 | 0.955 | NLT > NASH-W |
| cg14977069 | LIME1       | 0.972 | 0.439 | 1.07x10 <sup>-9</sup>  | 0.861 | 1     | NLT < NASH-W |
| cg15473066 | ZNF727      | 0.972 | 0.302 | 4.18x10 <sup>-8</sup>  | 0.889 | 1     | NLT < NASH-W |
| cg16692538 | N/A         | 0.972 | 0.568 | 3.85x10 <sup>-2</sup>  | 1     | 0.909 | NLT > NASH-W |
| cg17810609 | N/A         | 0.972 | 0.132 | 4.00x10 <sup>-4</sup>  | 0.944 | 0.909 | NLT < NASH-W |
| cg19007908 | TRPM4       | 0.972 | 0.628 | 2.13x10 <sup>-7</sup>  | 0.972 | 0.864 | NLT < NASH-W |
| cg20673919 | PATE4       | 0.972 | 0.469 | 3.64x10 <sup>-10</sup> | 0.889 | 1     | NLT > NASH-W |
| cg25220428 | N/A         | 0.972 | 0.67  | 4.38x10 <sup>-4</sup>  | 0.833 | 1     | NLT > NASH-W |
| cg03150409 | WHSC1       | 0.971 | 0.717 | 2.62x10 <sup>-11</sup> | 0.861 | 1     | NLT > NASH-W |
| cg04176488 | MGC23284    | 0.971 | 0.693 | 1.62x10 <sup>-8</sup>  | 0.833 | 1     | NLT > NASH-W |
| cg04536393 | C16orf91    | 0.971 | 0.486 | 2.25x10 <sup>-7</sup>  | 0.833 | 1     | NLT > NASH-W |
| cg07576222 | SMAD3       | 0.971 | 0.283 | 2.14x10 <sup>-8</sup>  | 0.889 | 1     | NLT < NASH-W |
| cg08213792 | N/A         | 0.971 | 0.648 | 3.59x10 <sup>-9</sup>  | 0.833 | 1     | NLT > NASH-W |
| cg08524474 | ARHGAP22    | 0.971 | 0.279 | 2.12x10 <sup>-9</sup>  | 0.917 | 0.955 | NLT < NASH-W |
| cg13810766 | PRKAG2      | 0.971 | 0.527 | 1.60x10 <sup>-11</sup> | 0.861 | 0.955 | NLT > NASH-W |
| cg14067770 | IRF7        | 0.971 | 0.249 | 2.28x10 <sup>-8</sup>  | 0.833 | 1     | NLT < NASH-W |
| cg14631053 | SSTR4       | 0.971 | 0.288 | 5.06x10 <sup>-3</sup>  | 0.889 | 0.955 | NLT < NASH-W |
| cg16357719 | RNPS1       | 0.971 | 0.145 | 3.17x10 <sup>-5</sup>  | 0.917 | 0.955 | NLT < NASH-W |
| cg18462141 | N/A         | 0.971 | 0.672 | 1.59x10 <sup>-9</sup>  | 0.889 | 0.955 | NLT > NASH-W |
| cg20615655 | FAM21B      | 0.971 | 0.846 | 1.41x10 <sup>-5</sup>  | 0.861 | 1     | NLT < NASH-W |
| cg24032568 | PPP2R2D     | 0.971 | 0.874 | 8.33x10 <sup>-4</sup>  | 0.972 | 0.909 | NLT < NASH-W |
| cg24153714 | C10orf11    | 0.971 | 0.782 | 7.46x10 <sup>-3</sup>  | 0.861 | 0.955 | NLT > NASH-W |
| cg27435660 | FBXO18      | 0.971 | 0.714 | 8.83x10 <sup>-10</sup> | 0.944 | 0.955 | NLT > NASH-W |
| cg13551841 | EHMT1       | 0.97  | 0.745 | 1.33x10 <sup>-6</sup>  | 1     | 0.909 | NLT < NASH-W |
| cg00336022 | N/A         | 0.97  | 0.735 | 1.42x10 <sup>-5</sup>  | 0.972 | 0.909 | NLT < NASH-W |

|            |             |       |       |                        |       |       |              |
|------------|-------------|-------|-------|------------------------|-------|-------|--------------|
| cg03973663 | LYN         | 0.97  | 0.401 | 4.36x10 <sup>-8</sup>  | 0.889 | 1     | NLT > NASH-W |
| cg04101934 | N/A         | 0.97  | 0.488 | 9.49x10 <sup>-7</sup>  | 0.861 | 0.955 | NLT < NASH-W |
| cg05211868 | N/A         | 0.97  | 0.497 | 1.43x10 <sup>-8</sup>  | 0.833 | 1     | NLT > NASH-W |
| cg06808467 | LOC339290   | 0.97  | 0.181 | 4.02x10 <sup>-10</sup> | 0.889 | 1     | NLT < NASH-W |
| cg06959657 | N/A         | 0.97  | 0.695 | 6.20x10 <sup>-9</sup>  | 0.972 | 0.909 | NLT > NASH-W |
| cg08679807 | ACOT7       | 0.97  | 0.709 | 1.54x10 <sup>-8</sup>  | 1     | 0.818 | NLT > NASH-W |
| cg16678686 | N/A         | 0.97  | 0.706 | 2.57x10 <sup>-6</sup>  | 0.917 | 0.909 | NLT > NASH-W |
| cg22958118 | N/A         | 0.97  | 0.653 | 2.53x10 <sup>-6</sup>  | 0.861 | 1     | NLT > NASH-W |
| cg23770142 | APOM        | 0.97  | 0.791 | 1.78x10 <sup>-7</sup>  | 0.917 | 0.909 | NLT < NASH-W |
| cg24893198 | N/A         | 0.97  | 0.865 | 1.05x10 <sup>-8</sup>  | 0.944 | 0.955 | NLT < NASH-W |
| cg26272214 | FAM5B       | 0.97  | 0.652 | 4.01x10 <sup>-3</sup>  | 0.889 | 1     | NLT > NASH-W |
| cg27654966 | CUX1        | 0.97  | 0.558 | 4.29x10 <sup>-8</sup>  | 0.944 | 0.909 | NLT < NASH-W |
| cg01775802 | RGS6        | 0.968 | 0.608 | 1.53x10 <sup>-9</sup>  | 0.917 | 0.909 | NLT > NASH-W |
| cg01870519 | EXOC2       | 0.968 | 0.634 | 1.91x10 <sup>-7</sup>  | 0.917 | 0.909 | NLT > NASH-W |
| cg02173067 | N/A         | 0.968 | 0.419 | 1.14x10 <sup>-3</sup>  | 0.833 | 1     | NLT < NASH-W |
| cg02642298 | PRDXDD1P    | 0.968 | 0.382 | 1.75x10 <sup>-7</sup>  | 0.889 | 1     | NLT < NASH-W |
| cg03473408 | MRPS18B     | 0.968 | 0.644 | 1.06x10 <sup>-5</sup>  | 0.972 | 0.909 | NLT < NASH-W |
| cg04473235 | N/A         | 0.968 | 0.617 | 8.13x10 <sup>-10</sup> | 0.861 | 0.955 | NLT > NASH-W |
| cg07737810 | N/A         | 0.968 | 0.596 | 1.08x10 <sup>-7</sup>  | 0.944 | 0.864 | NLT > NASH-W |
| cg09352908 | N/A         | 0.968 | 0.835 | 1.66x10 <sup>-9</sup>  | 0.889 | 0.955 | NLT > NASH-W |
| cg11964099 | N/A         | 0.968 | 0.407 | 6.59x10 <sup>-7</sup>  | 0.861 | 1     | NLT < NASH-W |
| cg23084309 | MLLT1       | 0.968 | 0.238 | 1.69x10 <sup>-9</sup>  | 0.917 | 0.955 | NLT < NASH-W |
| cg26330063 | FAM105A     | 0.968 | 0.629 | 3.28x10 <sup>-8</sup>  | 0.806 | 1     | NLT > NASH-W |
| cg26894854 | SLC45A3     | 0.968 | 0.493 | 5.46x10 <sup>-4</sup>  | 0.972 | 0.864 | NLT < NASH-W |
| cg00287477 | ACSL1       | 0.967 | 0.27  | 4.26x10 <sup>-2</sup>  | 0.917 | 0.955 | NLT < NASH-W |
| cg02524863 | N/A         | 0.967 | 0.445 | 1.82x10 <sup>-5</sup>  | 0.889 | 0.955 | NLT > NASH-W |
| cg06046629 | CACNA1D     | 0.967 | 0.619 | 4.39x10 <sup>-10</sup> | 0.833 | 1     | NLT > NASH-W |
| cg06366345 | SNORD114-31 | 0.967 | 0.755 | 9.16x10 <sup>-9</sup>  | 0.861 | 1     | NLT > NASH-W |
| cg09741240 | NQO2        | 0.967 | 0.167 | 1.03x10 <sup>-7</sup>  | 0.889 | 0.909 | NLT < NASH-W |
| cg11311843 | PHOSPHO1    | 0.967 | 0.308 | 1.91x10 <sup>-2</sup>  | 0.889 | 1     | NLT < NASH-W |
| cg11677260 | N/A         | 0.967 | 0.176 | 2.29x10 <sup>-4</sup>  | 0.833 | 1     | NLT < NASH-W |
| cg12417549 | N/A         | 0.967 | 0.634 | 1.15x10 <sup>-8</sup>  | 0.917 | 0.955 | NLT > NASH-W |
| cg14094333 | KLF3        | 0.967 | 0.264 | 3.79x10 <sup>-8</sup>  | 0.861 | 1     | NLT < NASH-W |
| cg15465107 | N/A         | 0.967 | 0.62  | 7.48x10 <sup>-11</sup> | 0.917 | 0.955 | NLT > NASH-W |
| cg19456996 | GABBR1      | 0.967 | 0.208 | 6.42x10 <sup>-7</sup>  | 0.861 | 0.955 | NLT < NASH-W |
| cg00593414 | N/A         | 0.966 | 0.639 | 1.02x10 <sup>-6</sup>  | 1     | 0.818 | NLT > NASH-W |
| cg01026613 | TMEM214     | 0.966 | 0.521 | 1.08x10 <sup>-5</sup>  | 0.889 | 0.909 | NLT < NASH-W |
| cg01400712 | EFR3B       | 0.966 | 0.418 | 1.17x10 <sup>-7</sup>  | 0.889 | 1     | NLT < NASH-W |
| cg06203912 | N/A         | 0.966 | 0.745 | 1.53x10 <sup>-10</sup> | 0.944 | 0.909 | NLT > NASH-W |
| cg10420223 | UBD         | 0.966 | 0.584 | 2.78x10 <sup>-9</sup>  | 0.972 | 0.955 | NLT > NASH-W |
| cg12387604 | ANKRD17     | 0.966 | 0.31  | 1.91x10 <sup>-9</sup>  | 0.861 | 0.955 | NLT < NASH-W |
| cg14317230 | MTDH        | 0.966 | 0.884 | 5.23x10 <sup>-5</sup>  | 0.972 | 0.818 | NLT < NASH-W |
| cg16636571 | GYPB        | 0.966 | 0.604 | 1.85x10 <sup>-6</sup>  | 0.861 | 1     | NLT > NASH-W |
| cg17218154 | KIAA0907    | 0.966 | 0.612 | 1.36x10 <sup>-7</sup>  | 0.944 | 0.864 | NLT < NASH-W |
| cg17476752 | N/A         | 0.966 | 0.563 | 1.01x10 <sup>-8</sup>  | 0.806 | 1     | NLT > NASH-W |
| cg17499729 | N/A         | 0.966 | 0.588 | 4.74x10 <sup>-8</sup>  | 0.861 | 0.955 | NLT > NASH-W |
| cg17847344 | EBF1        | 0.966 | 0.387 | 9.05x10 <sup>-5</sup>  | 0.972 | 0.864 | NLT < NASH-W |
| cg20390253 | C18orf22    | 0.966 | 0.308 | 4.05x10 <sup>-7</sup>  | 0.917 | 1     | NLT < NASH-W |
| cg25738236 | BRCA1       | 0.966 | 0.698 | 1.26x10 <sup>-7</sup>  | 0.861 | 0.955 | NLT > NASH-W |
| cg00987699 | WIPI2       | 0.965 | 0.199 | 2.14x10 <sup>-11</sup> | 0.944 | 0.955 | NLT < NASH-W |
| cg02531277 | CUX1        | 0.965 | 0.613 | 2.96x10 <sup>-6</sup>  | 0.917 | 0.909 | NLT < NASH-W |
| cg04396850 | N/A         | 0.965 | 0.691 | 5.30x10 <sup>-6</sup>  | 0.944 | 0.909 | NLT > NASH-W |
| cg05231098 | SMARCA4     | 0.965 | 0.489 | 4.90x10 <sup>-8</sup>  | 0.861 | 1     | NLT < NASH-W |
| cg08707819 | RCOR1       | 0.965 | 0.363 | 1.30x10 <sup>-8</sup>  | 0.917 | 0.909 | NLT < NASH-W |
| cg11397033 | N/A         | 0.965 | 0.769 | 5.57x10 <sup>-5</sup>  | 0.917 | 0.909 | NLT > NASH-W |
| cg12659254 | FBRSL1      | 0.965 | 0.606 | 2.55x10 <sup>-9</sup>  | 0.944 | 0.864 | NLT > NASH-W |
| cg13260314 | N/A         | 0.965 | 0.651 | 1.09x10 <sup>-7</sup>  | 0.806 | 1     | NLT > NASH-W |
| cg13896783 | CCDC148     | 0.965 | 0.337 | 1.53x10 <sup>-9</sup>  | 0.861 | 1     | NLT < NASH-W |

|            |           |       |       |                        |       |       |              |
|------------|-----------|-------|-------|------------------------|-------|-------|--------------|
| cg14880282 | LOC284232 | 0.965 | 0.624 | 5.69x10 <sup>-5</sup>  | 0.889 | 0.909 | NLT > NASH-W |
| cg19933985 | N/A       | 0.965 | 0.788 | 4.85x10 <sup>-8</sup>  | 0.889 | 0.909 | NLT > NASH-W |
| cg20769334 | SBF1      | 0.965 | 0.202 | 2.78x10 <sup>-8</sup>  | 0.889 | 0.955 | NLT < NASH-W |
| cg20809690 | TNIP2     | 0.965 | 0.369 | 6.58x10 <sup>-9</sup>  | 0.861 | 0.955 | NLT < NASH-W |
| cg23129217 | N/A       | 0.965 | 0.735 | 1.51x10 <sup>-5</sup>  | 0.889 | 0.955 | NLT > NASH-W |
| cg23601374 | HDAC4     | 0.965 | 0.55  | 4.16x10 <sup>-5</sup>  | 0.944 | 0.909 | NLT < NASH-W |
| cg26112390 | GOLGA2L1  | 0.965 | 0.721 | 1.17x10 <sup>-6</sup>  | 1     | 0.818 | NLT > NASH-W |
| cg05310990 | ZNF85     | 0.964 | 0.16  | 2.23x10 <sup>-6</sup>  | 0.806 | 1     | NLT < NASH-W |
| cg04584009 | REXO1     | 0.963 | 0.441 | 5.13x10 <sup>-7</sup>  | 0.917 | 0.909 | NLT < NASH-W |
| cg04662828 | N/A       | 0.963 | 0.525 | 1.86x10 <sup>-6</sup>  | 1     | 0.818 | NLT > NASH-W |
| cg05703502 | KIAA2018  | 0.963 | 0.506 | 8.60x10 <sup>-3</sup>  | 0.806 | 1     | NLT < NASH-W |
| cg05909891 | N/A       | 0.963 | 0.642 | 9.87x10 <sup>-9</sup>  | 0.861 | 0.955 | NLT > NASH-W |
| cg08579753 | N/A       | 0.963 | 0.534 | 6.88x10 <sup>-9</sup>  | 0.861 | 0.955 | NLT > NASH-W |
| cg09570855 | N/A       | 0.963 | 0.535 | 1.11x10 <sup>-6</sup>  | 0.778 | 1     | NLT > NASH-W |
| cg10875261 | N/A       | 0.963 | 0.811 | 3.36x10 <sup>-7</sup>  | 0.917 | 0.864 | NLT > NASH-W |
| cg15617548 | GORASP2   | 0.963 | 0.169 | 2.67x10 <sup>-8</sup>  | 0.806 | 1     | NLT < NASH-W |
| cg15888301 | NEO1      | 0.963 | 0.145 | 1.57x10 <sup>-5</sup>  | 0.917 | 0.955 | NLT < NASH-W |
| cg16157055 | N/A       | 0.963 | 0.578 | 1.64x10 <sup>-8</sup>  | 0.861 | 0.955 | NLT > NASH-W |
| cg19861632 | GPR125    | 0.963 | 0.545 | 3.86x10 <sup>-3</sup>  | 0.944 | 0.909 | NLT < NASH-W |
| cg20943076 | SDK1      | 0.963 | 0.757 | 4.85x10 <sup>-6</sup>  | 0.889 | 0.955 | NLT > NASH-W |
| cg21530210 | N/A       | 0.963 | 0.638 | 1.11x10 <sup>-6</sup>  | 0.972 | 0.909 | NLT > NASH-W |
| cg23108607 | KIAA0754  | 0.963 | 0.751 | 4.54x10 <sup>-7</sup>  | 0.861 | 0.955 | NLT > NASH-W |
| cg25444615 | N/A       | 0.963 | 0.374 | 3.74x10 <sup>-9</sup>  | 0.889 | 0.909 | NLT > NASH-W |
| cg10187692 | VPS13B    | 0.963 | 0.246 | 4.18x10 <sup>-3</sup>  | 0.861 | 1     | NLT < NASH-W |
| cg00470768 | INO80     | 0.962 | 0.583 | 3.48x10 <sup>-5</sup>  | 0.972 | 0.818 | NLT > NASH-W |
| cg00731201 | N/A       | 0.962 | 0.583 | 4.03x10 <sup>-4</sup>  | 0.917 | 0.955 | NLT > NASH-W |
| cg01601050 | STXBP6    | 0.962 | 0.233 | 1.35x10 <sup>-8</sup>  | 0.917 | 0.909 | NLT > NASH-W |
| cg03196364 | BEST3     | 0.962 | 0.538 | 1.77x10 <sup>-5</sup>  | 0.972 | 0.864 | NLT > NASH-W |
| cg03321231 | RPH3AL    | 0.962 | 0.711 | 1.31x10 <sup>-7</sup>  | 0.889 | 0.909 | NLT > NASH-W |
| cg05526438 | N/A       | 0.962 | 0.703 | 8.17x10 <sup>-9</sup>  | 0.917 | 0.955 | NLT > NASH-W |
| cg07661849 | ZNF827    | 0.962 | 0.643 | 4.77x10 <sup>-4</sup>  | 0.806 | 1     | NLT > NASH-W |
| cg07867325 | N/A       | 0.962 | 0.671 | 2.42x10 <sup>-8</sup>  | 0.889 | 0.955 | NLT > NASH-W |
| cg08365438 | N/A       | 0.962 | 0.654 | 1.04x10 <sup>-8</sup>  | 0.778 | 1     | NLT > NASH-W |
| cg09622330 | GRIN2A    | 0.962 | 0.77  | 3.15x10 <sup>-7</sup>  | 0.861 | 0.955 | NLT > NASH-W |
| cg11855759 | USP43     | 0.962 | 0.191 | 1.00x10 <sup>-8</sup>  | 0.889 | 0.955 | NLT < NASH-W |
| cg12887985 | N/A       | 0.962 | 0.187 | 3.01x10 <sup>-7</sup>  | 0.917 | 0.909 | NLT < NASH-W |
| cg13435243 | LRRC8A    | 0.962 | 0.858 | 1.04x10 <sup>-3</sup>  | 0.889 | 0.909 | NLT < NASH-W |
| cg23322242 | N/A       | 0.962 | 0.491 | 4.23x10 <sup>-11</sup> | 0.806 | 1     | NLT > NASH-W |
| cg23785719 | STK17A    | 0.962 | 0.268 | 8.84x10 <sup>-8</sup>  | 0.944 | 0.909 | NLT < NASH-W |
| cg24016617 | N/A       | 0.962 | 0.625 | 1.00x10 <sup>-5</sup>  | 0.833 | 0.952 | NLT > NASH-W |
| cg10475689 | RUNDC2A   | 0.961 | 0.6   | 1.45x10 <sup>-8</sup>  | 0.829 | 1     | NLT > NASH-W |
| cg01228685 | PLEC1     | 0.961 | 0.659 | 3.90x10 <sup>-5</sup>  | 0.972 | 0.818 | NLT > NASH-W |
| cg03916189 | N/A       | 0.961 | 0.417 | 1.99x10 <sup>-4</sup>  | 0.972 | 0.909 | NLT > NASH-W |
| cg04800503 | HOXB3     | 0.961 | 0.409 | 1.90x10 <sup>-6</sup>  | 0.861 | 0.955 | NLT < NASH-W |
| cg07797518 | LRRFIP1   | 0.961 | 0.334 | 5.53x10 <sup>-6</sup>  | 0.944 | 0.864 | NLT < NASH-W |
| cg09789536 | KLHL17    | 0.961 | 0.308 | 3.90x10 <sup>-8</sup>  | 0.889 | 0.955 | NLT < NASH-W |
| cg13041389 | N/A       | 0.961 | 0.532 | 2.40x10 <sup>-5</sup>  | 0.972 | 0.909 | NLT > NASH-W |
| cg13231117 | N/A       | 0.961 | 0.757 | 1.28x10 <sup>-7</sup>  | 0.861 | 0.955 | NLT > NASH-W |
| cg15615645 | C10orf26  | 0.961 | 0.413 | 1.28x10 <sup>-3</sup>  | 0.917 | 0.909 | NLT < NASH-W |
| cg15828524 | CACNB3    | 0.961 | 0.738 | 1.61x10 <sup>-7</sup>  | 0.889 | 0.909 | NLT < NASH-W |
| cg19569340 | RNF216    | 0.961 | 0.427 | 1.15x10 <sup>-7</sup>  | 0.917 | 0.955 | NLT < NASH-W |
| cg23113715 | N/A       | 0.961 | 0.288 | 1.52x10 <sup>-9</sup>  | 0.861 | 1     | NLT < NASH-W |
| cg23713156 | WDR45L    | 0.961 | 0.193 | 6.56x10 <sup>-8</sup>  | 0.806 | 1     | NLT < NASH-W |
| cg25548582 | UTP14C    | 0.961 | 0.767 | 2.19x10 <sup>-4</sup>  | 0.917 | 1     | NLT > NASH-W |
| cg00431813 | C7orf50   | 0.96  | 0.542 | 1.38x10 <sup>-6</sup>  | 0.944 | 0.909 | NLT < NASH-W |
| cg01779076 | CFLAR     | 0.96  | 0.332 | 4.44x10 <sup>-7</sup>  | 0.889 | 0.909 | NLT < NASH-W |
| cg02510736 | ZCCHC24   | 0.96  | 0.186 | 1.38x10 <sup>-9</sup>  | 0.833 | 1     | NLT < NASH-W |
| cg02792602 | TNS1      | 0.96  | 0.214 | 7.17x10 <sup>-8</sup>  | 0.833 | 1     | NLT < NASH-W |

|            |            |       |       |                        |       |       |              |
|------------|------------|-------|-------|------------------------|-------|-------|--------------|
| cg04607442 | N/A        | 0.96  | 0.179 | 3.33x10 <sup>-8</sup>  | 0.889 | 0.955 | NLT < NASH-W |
| cg04680436 | N/A        | 0.96  | 0.548 | 4.32x10 <sup>-4</sup>  | 0.944 | 0.909 | NLT < NASH-W |
| cg04762129 | N/A        | 0.96  | 0.552 | 1.58x10 <sup>-7</sup>  | 0.806 | 1     | NLT > NASH-W |
| cg04786142 | N/A        | 0.96  | 0.698 | 7.34x10 <sup>-4</sup>  | 0.917 | 0.909 | NLT > NASH-W |
| cg05393736 | NRBF2      | 0.96  | 0.701 | 1.43x10 <sup>-6</sup>  | 0.972 | 0.818 | NLT < NASH-W |
| cg06356708 | RCC2       | 0.96  | 0.822 | 6.33x10 <sup>-6</sup>  | 0.806 | 1     | NLT < NASH-W |
| cg06606511 | N/A        | 0.96  | 0.617 | 7.12x10 <sup>-10</sup> | 0.806 | 1     | NLT > NASH-W |
| cg08648997 | LRP5       | 0.96  | 0.683 | 3.15x10 <sup>-6</sup>  | 0.972 | 0.909 | NLT < NASH-W |
| cg10199913 | HIST1H3C   | 0.96  | 0.164 | 9.70x10 <sup>-5</sup>  | 0.778 | 1     | NLT < NASH-W |
| cg14520079 | N/A        | 0.96  | 0.524 | 4.10x10 <sup>-6</sup>  | 0.917 | 0.864 | NLT > NASH-W |
| cg14564724 | ABCA1      | 0.96  | 0.446 | 7.75x10 <sup>-5</sup>  | 0.889 | 0.955 | NLT < NASH-W |
| cg15574461 | SRC        | 0.96  | 0.822 | 3.56x10 <sup>-3</sup>  | 0.944 | 0.864 | NLT < NASH-W |
| cg16136385 | CKAP5      | 0.96  | 0.284 | 8.63x10 <sup>-9</sup>  | 0.889 | 1     | NLT < NASH-W |
| cg16920238 | CCDC57     | 0.96  | 0.547 | 2.31x10 <sup>-3</sup>  | 0.889 | 0.955 | NLT < NASH-W |
| cg17030628 | IL20       | 0.96  | 0.461 | 4.00x10 <sup>-4</sup>  | 0.889 | 0.955 | NLT < NASH-W |
| cg17030981 | ZNF876P    | 0.96  | 0.715 | 5.54x10 <sup>-9</sup>  | 0.833 | 0.955 | NLT > NASH-W |
| cg18371636 | POM121C    | 0.96  | 0.716 | 7.48x10 <sup>-8</sup>  | 0.861 | 0.955 | NLT > NASH-W |
| cg19513374 | ZNF311     | 0.96  | 0.714 | 1.59x10 <sup>-5</sup>  | 0.778 | 1     | NLT > NASH-W |
| cg21610999 | SPDYE4     | 0.96  | 0.609 | 6.56x10 <sup>-10</sup> | 0.889 | 1     | NLT > NASH-W |
| cg21685006 | PPP1R2P1   | 0.96  | 0.578 | 3.87x10 <sup>-4</sup>  | 0.917 | 0.909 | NLT < NASH-W |
| cg22900519 | N/A        | 0.96  | 0.778 | 1.46x10 <sup>-8</sup>  | 0.889 | 1     | NLT > NASH-W |
| cg27056425 | HIST1H2AI  | 0.96  | 0.147 | 3.50x10 <sup>-4</sup>  | 0.889 | 0.955 | NLT < NASH-W |
| cg01864791 | BHLHE40    | 0.958 | 0.571 | 2.15x10 <sup>-2</sup>  | 0.917 | 0.955 | NLT < NASH-W |
| cg05596328 | N/A        | 0.958 | 0.241 | 3.87x10 <sup>-4</sup>  | 0.944 | 0.909 | NLT < NASH-W |
| cg05997362 | LYN        | 0.958 | 0.428 | 5.05x10 <sup>-7</sup>  | 0.833 | 1     | NLT > NASH-W |
| cg06375525 | ESPNL      | 0.958 | 0.796 | 8.04x10 <sup>-4</sup>  | 0.861 | 1     | NLT < NASH-W |
| cg10827434 | RPF1       | 0.958 | 0.108 | 2.41x10 <sup>-6</sup>  | 0.833 | 1     | NLT < NASH-W |
| cg11223184 | ANKRD44    | 0.958 | 0.837 | 4.70x10 <sup>-7</sup>  | 0.778 | 1     | NLT < NASH-W |
| cg14325661 | TRPM4      | 0.958 | 0.646 | 7.36x10 <sup>-7</sup>  | 0.972 | 0.909 | NLT < NASH-W |
| cg15050398 | N/A        | 0.958 | 0.473 | 1.68x10 <sup>-7</sup>  | 1     | 0.773 | NLT > NASH-W |
| cg15610437 | AZU1       | 0.958 | 0.7   | 6.70x10 <sup>-5</sup>  | 0.944 | 0.909 | NLT > NASH-W |
| cg16015499 | TAGLN2     | 0.958 | 0.821 | 2.79x10 <sup>-7</sup>  | 0.889 | 0.955 | NLT > NASH-W |
| cg16674116 | TOLLIP     | 0.958 | 0.531 | 1.98x10 <sup>-5</sup>  | 0.917 | 0.909 | NLT < NASH-W |
| cg17095167 | N/A        | 0.958 | 0.795 | 6.14x10 <sup>-8</sup>  | 0.806 | 1     | NLT > NASH-W |
| cg21285133 | ANP32E     | 0.958 | 0.364 | 3.99x10 <sup>-7</sup>  | 0.972 | 0.818 | NLT > NASH-W |
| cg21397124 | N/A        | 0.958 | 0.562 | 2.54x10 <sup>-5</sup>  | 0.889 | 0.909 | NLT > NASH-W |
| cg26528255 | TMEM222    | 0.958 | 0.713 | 7.40x10 <sup>-8</sup>  | 0.861 | 0.955 | NLT > NASH-W |
| cg14950303 | FOXD4L1    | 0.957 | 0.519 | 2.88x10 <sup>-6</sup>  | 0.914 | 0.909 | NLT < NASH-W |
| cg00109302 | N/A        | 0.957 | 0.167 | 5.88x10 <sup>-4</sup>  | 0.917 | 0.955 | NLT < NASH-W |
| cg01236961 | N/A        | 0.957 | 0.615 | 1.08x10 <sup>-6</sup>  | 0.861 | 0.955 | NLT > NASH-W |
| cg01346915 | UBE2I      | 0.957 | 0.877 | 3.44x10 <sup>-5</sup>  | 0.889 | 0.909 | NLT < NASH-W |
| cg02095553 | N/A        | 0.957 | 0.62  | 1.50x10 <sup>-6</sup>  | 0.889 | 0.909 | NLT > NASH-W |
| cg02536431 | TUBB       | 0.957 | 0.606 | 7.59x10 <sup>-6</sup>  | 0.75  | 1     | NLT > NASH-W |
| cg03734864 | PRR5L      | 0.957 | 0.505 | 3.67x10 <sup>-5</sup>  | 0.889 | 0.909 | NLT < NASH-W |
| cg04680494 | KIF25      | 0.957 | 0.733 | 2.12x10 <sup>-5</sup>  | 0.861 | 0.955 | NLT > NASH-W |
| cg05357347 | N/A        | 0.957 | 0.785 | 4.90x10 <sup>-5</sup>  | 0.778 | 1     | NLT > NASH-W |
| cg10530613 | TRIT1      | 0.957 | 0.83  | 1.16x10 <sup>-4</sup>  | 0.917 | 0.955 | NLT < NASH-W |
| cg10558740 | FLJ22536   | 0.957 | 0.688 | 2.51x10 <sup>-3</sup>  | 0.944 | 0.864 | NLT > NASH-W |
| cg10632328 | FLJ35220   | 0.957 | 0.183 | 2.97x10 <sup>-4</sup>  | 0.972 | 0.818 | NLT < NASH-W |
| cg11152384 | N/A        | 0.957 | 0.429 | 1.38x10 <sup>-6</sup>  | 0.972 | 0.909 | NLT > NASH-W |
| cg11218561 | N/A        | 0.957 | 0.756 | 6.05x10 <sup>-7</sup>  | 0.833 | 1     | NLT > NASH-W |
| cg13048147 | ATP5H      | 0.957 | 0.594 | 1.76x10 <sup>-5</sup>  | 0.861 | 0.955 | NLT < NASH-W |
| cg17341174 | BAIAP2L1   | 0.957 | 0.504 | 1.92x10 <sup>-5</sup>  | 0.944 | 0.909 | NLT < NASH-W |
| cg18545992 | NCRNA00164 | 0.957 | 0.498 | 9.86x10 <sup>-7</sup>  | 1     | 0.818 | NLT > NASH-W |
| cg20407713 | DLG2       | 0.957 | 0.791 | 2.18x10 <sup>-8</sup>  | 0.917 | 0.909 | NLT > NASH-W |
| cg21290290 | C1orf93    | 0.957 | 0.165 | 3.46x10 <sup>-6</sup>  | 0.889 | 0.909 | NLT < NASH-W |
| cg25187967 | N/A        | 0.957 | 0.804 | 1.73x10 <sup>-8</sup>  | 0.833 | 1     | NLT > NASH-W |
| cg26015681 | N/A        | 0.957 | 0.481 | 1.64x10 <sup>-3</sup>  | 0.944 | 0.864 | NLT > NASH-W |



|            |              |       |       |                        |       |       |              |
|------------|--------------|-------|-------|------------------------|-------|-------|--------------|
| cg25367568 | GNAS         | 0.956 | 0.671 | 1.62x10 <sup>-2</sup>  | 0.914 | 0.955 | NLT > NASH-W |
| cg01079950 | N/A          | 0.956 | 0.651 | 3.13x10 <sup>-2</sup>  | 0.944 | 0.864 | NLT > NASH-W |
| cg01730258 | SNX32        | 0.956 | 0.528 | 9.00x10 <sup>-5</sup>  | 0.917 | 0.909 | NLT < NASH-W |
| cg01993208 | C9orf3       | 0.956 | 0.42  | 5.41x10 <sup>-5</sup>  | 0.917 | 0.955 | NLT < NASH-W |
| cg01994308 | PLAG1        | 0.956 | 0.253 | 2.02x10 <sup>-8</sup>  | 0.861 | 0.955 | NLT < NASH-W |
| cg02788013 | INPP5D       | 0.956 | 0.662 | 2.65x10 <sup>-5</sup>  | 0.806 | 1     | NLT > NASH-W |
| cg03008165 | N/A          | 0.956 | 0.796 | 9.94x10 <sup>-9</sup>  | 0.861 | 0.955 | NLT > NASH-W |
| cg03274739 | N/A          | 0.956 | 0.844 | 1.60x10 <sup>-2</sup>  | 0.833 | 1     | NLT > NASH-W |
| cg05060577 | N/A          | 0.956 | 0.565 | 3.20x10 <sup>-3</sup>  | 0.833 | 1     | NLT > NASH-W |
| cg05484985 | N/A          | 0.956 | 0.637 | 8.65x10 <sup>-5</sup>  | 0.972 | 0.864 | NLT < NASH-W |
| cg05742286 | N/A          | 0.956 | 0.704 | 1.35x10 <sup>-8</sup>  | 0.889 | 0.909 | NLT > NASH-W |
| cg07628073 | N/A          | 0.956 | 0.611 | 1.28x10 <sup>-7</sup>  | 0.944 | 0.909 | NLT < NASH-W |
| cg07762785 | ZNF486       | 0.956 | 0.683 | 1.30x10 <sup>-6</sup>  | 0.944 | 0.909 | NLT > NASH-W |
| cg08775137 | N/A          | 0.956 | 0.736 | 4.85x10 <sup>-4</sup>  | 0.972 | 0.909 | NLT > NASH-W |
| cg09686800 | IPMK         | 0.956 | 0.679 | 6,74x10 <sup>-6</sup>  | 0.972 | 0.818 | NLT < NASH-W |
| cg10752406 | AZU1         | 0.956 | 0.592 | 1.08x10 <sup>-6</sup>  | 0.833 | 1     | NLT > NASH-W |
| cg12828313 | N/A          | 0.956 | 0.197 | 1.37x10 <sup>-9</sup>  | 0.889 | 0.955 | NLT < NASH-W |
| cg18210511 | ZC3H3        | 0.956 | 0.521 | 1.20x10 <sup>-5</sup>  | 0.889 | 0.909 | NLT < NASH-W |
| cg19015611 | VAX2         | 0.956 | 0.463 | 3.57x10 <sup>-10</sup> | 0.806 | 1     | NLT < NASH-W |
| cg19556901 | SNORD115-1   | 0.956 | 0.789 | 6.59x10 <sup>-6</sup>  | 0.889 | 0.909 | NLT > NASH-W |
| cg19955284 | SLC44A4      | 0.956 | 0.609 | 1.60x10 <sup>-6</sup>  | 0.889 | 0.955 | NLT < NASH-W |
| cg23157419 | PTPN9        | 0.956 | 0.672 | 1.39x10 <sup>-6</sup>  | 0.833 | 1     | NLT < NASH-W |
| cg23465426 | PPP1R2P1     | 0.956 | 0.597 | 3.17x10 <sup>-7</sup>  | 0.806 | 1     | NLT > NASH-W |
| cg23476209 | LOC100133315 | 0.956 | 0.574 | 1.72x10 <sup>-4</sup>  | 0.861 | 1     | NLT < NASH-W |
| cg24599650 | RPL8         | 0.956 | 0.638 | 1.48x10 <sup>-5</sup>  | 0.889 | 0.909 | NLT > NASH-W |
| cg27055601 | LAMP1        | 0.956 | 0.504 | 4.30x10 <sup>-3</sup>  | 0.806 | 1     | NLT < NASH-W |
| cg00236302 | RAP1B        | 0.955 | 0.461 | 4.57x10 <sup>-7</sup>  | 0.889 | 0.955 | NLT < NASH-W |
| cg03092271 | RPSAP58      | 0.955 | 0.594 | 1.67x10 <sup>-6</sup>  | 0.914 | 0.864 | NLT > NASH-W |
| cg04010872 | N/A          | 0.955 | 0.752 | 2.70x10 <sup>-3</sup>  | 0.861 | 0.955 | NLT > NASH-W |
| cg04892437 | TSNAX-DISC1  | 0.955 | 0.494 | 3.84x10 <sup>-5</sup>  | 0.972 | 0.909 | NLT < NASH-W |
| cg07102320 | N/A          | 0.955 | 0.504 | 1.02x10 <sup>-6</sup>  | 0.944 | 0.864 | NLT < NASH-W |
| cg07475178 | LDHD         | 0.955 | 0.742 | 3.75x10 <sup>-7</sup>  | 0.944 | 0.909 | NLT < NASH-W |
| cg09141413 | GPRC5B       | 0.955 | 0.233 | 8.96x10 <sup>-6</sup>  | 0.972 | 0.818 | NLT < NASH-W |
| cg10690677 | CLCA4        | 0.955 | 0.843 | 4.62x10 <sup>-7</sup>  | 0.917 | 0.955 | NLT > NASH-W |
| cg12538597 | N/A          | 0.955 | 0.677 | 2.11x10 <sup>-7</sup>  | 0.861 | 0.955 | NLT > NASH-W |
| cg14058010 | N/A          | 0.955 | 0.31  | 1.28x10 <sup>-6</sup>  | 0.917 | 0.864 | NLT > NASH-W |
| cg17424859 | N/A          | 0.955 | 0.704 | 9.04x10 <sup>-7</sup>  | 0.861 | 0.955 | NLT > NASH-W |
| cg19751754 | N/A          | 0.955 | 0.564 | 4.96x10 <sup>-6</sup>  | 0.889 | 0.864 | NLT > NASH-W |
| cg21518151 | N/A          | 0.955 | 0.628 | 3.86x10 <sup>-8</sup>  | 0.944 | 0.909 | NLT > NASH-W |
| cg22685816 | MUC6         | 0.955 | 0.505 | 1.45x10 <sup>-3</sup>  | 0.917 | 0.864 | NLT < NASH-W |
| cg22921692 | FBXL12       | 0.955 | 0.68  | 2.19x10 <sup>-7</sup>  | 0.889 | 0.909 | NLT > NASH-W |
| cg24192846 | PPP1R11      | 0.955 | 0.674 | 5.74x10 <sup>-9</sup>  | 0.861 | 0.955 | NLT > NASH-W |
| cg24946729 | DTNA         | 0.955 | 0.607 | 2.24x10 <sup>-5</sup>  | 0.889 | 0.955 | NLT < NASH-W |
| cg26111913 | FARP1        | 0.955 | 0.71  | 2.46x10 <sup>-7</sup>  | 0.889 | 0.909 | NLT > NASH-W |
| cg27048142 | IGFL4        | 0.955 | 0.674 | 8.63x10 <sup>-5</sup>  | 0.889 | 0.955 | NLT > NASH-W |
| cg22306579 | ZBTB12       | 0.955 | 0.385 | 2.35x10 <sup>-5</sup>  | 0.917 | 0.909 | NLT < NASH-W |
| cg01214458 | MN1          | 0.953 | 0.302 | 1.84x10 <sup>-3</sup>  | 0.833 | 0.955 | NLT < NASH-W |
| cg01488306 | F13B         | 0.953 | 0.61  | 1.18x10 <sup>-4</sup>  | 1     | 0.773 | NLT > NASH-W |
| cg02072589 | N/A          | 0.953 | 0.583 | 9.33x10 <sup>-7</sup>  | 0.861 | 0.955 | NLT > NASH-W |
| cg02438164 | N/A          | 0.953 | 0.52  | 2.65x10 <sup>-6</sup>  | 0.889 | 0.864 | NLT > NASH-W |
| cg02596190 | BNIP2        | 0.953 | 0.439 | 2.19x10 <sup>-5</sup>  | 1     | 0.818 | NLT < NASH-W |
| cg03488113 | N/A          | 0.953 | 0.685 | 1.61x10 <sup>-6</sup>  | 0.861 | 0.955 | NLT > NASH-W |
| cg04628742 | HLA-J        | 0.953 | 0.762 | 1.34x10 <sup>-3</sup>  | 0.833 | 1     | NLT > NASH-W |
| cg05998816 | PCNT         | 0.953 | 0.803 | 6.79x10 <sup>-6</sup>  | 0.972 | 0.818 | NLT > NASH-W |
| cg06752157 | MYST4        | 0.953 | 0.55  | 1.65x10 <sup>-2</sup>  | 0.861 | 0.909 | NLT < NASH-W |
| cg08008286 | SULT1A1      | 0.953 | 0.467 | 5.12x10 <sup>-5</sup>  | 0.833 | 1     | NLT < NASH-W |
| cg08450091 | N/A          | 0.953 | 0.704 | 7.64x10 <sup>-11</sup> | 0.889 | 0.955 | NLT > NASH-W |
| cg08858272 | NALCN        | 0.953 | 0.412 | 4.4x10 <sup>-6</sup>   | 0.889 | 0.955 | NLT > NASH-W |

|            |              |       |       |                       |       |       |              |
|------------|--------------|-------|-------|-----------------------|-------|-------|--------------|
| cg10195415 | TRIM65       | 0.953 | 0.557 | 2.04x10 <sup>-2</sup> | 0.889 | 0.909 | NLT < NASH-W |
| cg10888281 | CEP68        | 0.953 | 0.322 | 1.42x10 <sup>-5</sup> | 0.778 | 1     | NLT < NASH-W |
| cg11010178 | C6orf174     | 0.953 | 0.203 | 1.23x10 <sup>-6</sup> | 0.861 | 0.955 | NLT < NASH-W |
| cg11820154 | N/A          | 0.953 | 0.513 | 1.70x10 <sup>-5</sup> | 0.972 | 0.909 | NLT < NASH-W |
| cg11822175 | N/A          | 0.953 | 0.692 | 3.75x10 <sup>-2</sup> | 0.944 | 0.818 | NLT > NASH-W |
| cg11957128 | LOC150786    | 0.953 | 0.607 | 1.20x10 <sup>-6</sup> | 0.806 | 1     | NLT > NASH-W |
| cg13560760 | PMPCA        | 0.953 | 0.635 | 7.01x10 <sup>-7</sup> | 0.806 | 1     | NLT > NASH-W |
| cg14072016 | DIP2C        | 0.953 | 0.395 | 4.09x10 <sup>-2</sup> | 0.833 | 1     | NLT < NASH-W |
| cg15371806 | KIF25        | 0.953 | 0.692 | 1.37x10 <sup>-4</sup> | 0.889 | 0.955 | NLT > NASH-W |
| cg15945209 | N/A          | 0.953 | 0.594 | 3.86x10 <sup>-5</sup> | 1     | 0.773 | NLT > NASH-W |
| cg17304646 | N/A          | 0.953 | 0.346 | 6.11x10 <sup>-4</sup> | 0.944 | 0.864 | NLT < NASH-W |
| cg23932332 | DUSP10       | 0.953 | 0.6   | 1.52x10 <sup>-3</sup> | 0.833 | 1     | NLT < NASH-W |
| cg24939819 | GPN2         | 0.953 | 0.473 | 7.25x10 <sup>-5</sup> | 0.861 | 0.955 | NLT < NASH-W |
| cg25270498 | METRNL       | 0.953 | 0.194 | 9.85x10 <sup>-8</sup> | 0.861 | 0.955 | NLT < NASH-W |
| cg26385097 | N/A          | 0.953 | 0.366 | 4.22x10 <sup>-6</sup> | 0.944 | 0.864 | NLT > NASH-W |
| cg26414000 | C1orf52      | 0.953 | 0.336 | 1.73x10 <sup>-3</sup> | 0.833 | 0.955 | NLT < NASH-W |
| cg26583598 | ZSWIM6       | 0.953 | 0.727 | 9.95x10 <sup>-7</sup> | 0.972 | 0.864 | NLT < NASH-W |
| cg09232069 | SEC14L1      | 0.953 | 0.319 | 1.27x10 <sup>-3</sup> | 0.943 | 0.864 | NLT < NASH-W |
| cg00334245 | N/A          | 0.952 | 0.136 | 7.97x10 <sup>-4</sup> | 0.861 | 1     | NLT < NASH-W |
| cg02642549 | LHFPL2       | 0.952 | 0.382 | 6.44x10 <sup>-8</sup> | 0.833 | 0.955 | NLT > NASH-W |
| cg03674076 | CSNK2A1      | 0.952 | 0.291 | 3.79x10 <sup>-6</sup> | 0.917 | 0.909 | NLT < NASH-W |
| cg05341610 | ZNF264       | 0.952 | 0.687 | 2.32x10 <sup>-5</sup> | 0.972 | 0.818 | NLT > NASH-W |
| cg06852575 | ZNF257       | 0.952 | 0.264 | 3.68x10 <sup>-8</sup> | 0.889 | 0.955 | NLT < NASH-W |
| cg07039975 | DCTN1        | 0.952 | 0.507 | 7.93x10 <sup>-3</sup> | 0.944 | 0.864 | NLT < NASH-W |
| cg07058086 | KIF13B       | 0.952 | 0.212 | 1.01x10 <sup>-7</sup> | 0.889 | 0.955 | NLT < NASH-W |
| cg07100957 | ZNF324       | 0.952 | 0.722 | 3.73x10 <sup>-6</sup> | 0.972 | 0.773 | NLT > NASH-W |
| cg08072980 | IKZF1        | 0.952 | 0.653 | 8.63x10 <sup>-9</sup> | 0.861 | 1     | NLT > NASH-W |
| cg08914926 | CLIP1        | 0.952 | 0.683 | 4.82x10 <sup>-6</sup> | 0.917 | 0.909 | NLT < NASH-W |
| cg11354266 | LOC285954    | 0.952 | 0.409 | 4.12x10 <sup>-2</sup> | 0.972 | 0.864 | NLT < NASH-W |
| cg11527367 | C1orf152     | 0.952 | 0.638 | 3.23x10 <sup>-9</sup> | 0.917 | 0.909 | NLT > NASH-W |
| cg12728623 | COMT         | 0.952 | 0.467 | 6.76x10 <sup>-4</sup> | 0.917 | 0.909 | NLT < NASH-W |
| cg12895701 | N/A          | 0.952 | 0.73  | 3.65x10 <sup>-7</sup> | 0.972 | 0.818 | NLT < NASH-W |
| cg15164048 | ARHGEF10     | 0.952 | 0.749 | 4.66x10 <sup>-6</sup> | 1     | 0.818 | NLT > NASH-W |
| cg17806401 | LYN          | 0.952 | 0.572 | 2.14x10 <sup>-5</sup> | 0.917 | 0.909 | NLT > NASH-W |
| cg18440889 | SHANK2       | 0.952 | 0.767 | 1.00x10 <sup>-8</sup> | 0.833 | 1     | NLT > NASH-W |
| cg18593660 | NAV2         | 0.952 | 0.425 | 2.18x10 <sup>-6</sup> | 0.917 | 0.909 | NLT < NASH-W |
| cg20023538 | N/A          | 0.952 | 0.639 | 7.73x10 <sup>-6</sup> | 1     | 0.773 | NLT > NASH-W |
| cg24738257 | N/A          | 0.952 | 0.646 | 3.42x10 <sup>-6</sup> | 0.889 | 0.955 | NLT > NASH-W |
| cg24958366 | N/A          | 0.952 | 0.459 | 2.03x10 <sup>-6</sup> | 0.944 | 0.864 | NLT > NASH-W |
| cg25098401 | LCE2B        | 0.952 | 0.687 | 4.78x10 <sup>-3</sup> | 0.861 | 1     | NLT > NASH-W |
| cg26215406 | MCF2L2       | 0.952 | 0.652 | 1.70x10 <sup>-3</sup> | 0.917 | 0.909 | NLT > NASH-W |
| cg26520012 | N/A          | 0.952 | 0.288 | 9.16x10 <sup>-5</sup> | 0.917 | 0.909 | NLT < NASH-W |
| cg13719443 | LOC285847    | 0.952 | 0.413 | 9.08x10 <sup>-8</sup> | 0.943 | 0.909 | NLT > NASH-W |
| cg14288091 | NIPAL2       | 0.952 | 0.186 | 7.29x10 <sup>-6</sup> | 0.914 | 0.909 | NLT > NASH-W |
| cg16898066 | HIST1H2BA    | 0.952 | 0.718 | 3.70x10 <sup>-6</sup> | 0.857 | 0.955 | NLT > NASH-W |
| cg00316520 | N/A          | 0.951 | 0.727 | 1.40x10 <sup>-5</sup> | 0.889 | 0.909 | NLT > NASH-W |
| cg00318436 | PAR6A        | 0.951 | 0.528 | 7.33x10 <sup>-7</sup> | 0.944 | 0.909 | NLT < NASH-W |
| cg01554453 | ENPP1        | 0.951 | 0.275 | 8.65x10 <sup>-8</sup> | 0.861 | 1     | NLT < NASH-W |
| cg02539829 | PGAP1        | 0.951 | 0.866 | 2.09x10 <sup>-5</sup> | 1     | 0.818 | NLT < NASH-W |
| cg02718464 | SUGT1L1      | 0.951 | 0.806 | 5.15x10 <sup>-5</sup> | 0.861 | 0.955 | NLT > NASH-W |
| cg03611809 | N/A          | 0.951 | 0.769 | 1.33x10 <sup>-6</sup> | 0.917 | 0.864 | NLT < NASH-W |
| cg03853620 | PK4          | 0.951 | 0.566 | 4.64x10 <sup>-5</sup> | 0.861 | 0.955 | NLT < NASH-W |
| cg04020984 | LOC100270746 | 0.951 | 0.259 | 9.48x10 <sup>-8</sup> | 0.889 | 1     | NLT < NASH-W |
| cg04396721 | MOSC1        | 0.951 | 0.499 | 2.73x10 <sup>-2</sup> | 0.889 | 0.864 | NLT < NASH-W |
| cg05064489 | SEC31B       | 0.951 | 0.47  | 1.10x10 <sup>-4</sup> | 0.944 | 0.909 | NLT < NASH-W |
| cg05234035 | N/A          | 0.951 | 0.245 | 2.40x10 <sup>-5</sup> | 0.944 | 0.864 | NLT < NASH-W |
| cg05861743 | APOM         | 0.951 | 0.808 | 1.64x10 <sup>-7</sup> | 0.944 | 0.909 | NLT < NASH-W |
| cg07223240 | N/A          | 0.951 | 0.701 | 2.90x10 <sup>-7</sup> | 0.889 | 0.909 | NLT > NASH-W |

|            |                  |       |       |                       |       |       |              |
|------------|------------------|-------|-------|-----------------------|-------|-------|--------------|
| cg09212610 | <i>GABARAPL3</i> | 0.951 | 0.791 | $2.04 \times 10^{-7}$ | 0.917 | 0.909 | NLT > NASH-W |
| cg09580859 | <i>ZC3H3</i>     | 0.951 | 0.653 | $4.45 \times 10^{-5}$ | 0.889 | 0.909 | NLT < NASH-W |
| cg11586591 | <i>SORL1</i>     | 0.951 | 0.577 | $4.19 \times 10^{-4}$ | 0.833 | 0.955 | NLT < NASH-W |
| cg11772086 | <i>MCC</i>       | 0.951 | 0.509 | $1.14 \times 10^{-3}$ | 0.889 | 0.909 | NLT < NASH-W |
| cg14579098 | <i>ILF3</i>      | 0.951 | 0.645 | $2.92 \times 10^{-5}$ | 0.833 | 0.955 | NLT > NASH-W |
| cg16074383 | <i>ZNF219</i>    | 0.951 | 0.713 | $3.19 \times 10^{-6}$ | 0.889 | 0.909 | NLT < NASH-W |
| cg16117273 | <i>PRKD1</i>     | 0.951 | 0.29  | $2.73 \times 10^{-6}$ | 0.889 | 0.955 | NLT < NASH-W |
| cg16282910 | <i>N/A</i>       | 0.951 | 0.657 | $4.96 \times 10^{-8}$ | 0.833 | 1     | NLT > NASH-W |
| cg16478145 | <i>TFPI</i>      | 0.951 | 0.544 | $3.53 \times 10^{-4}$ | 0.917 | 0.909 | NLT < NASH-W |
| cg17461271 | <i>N/A</i>       | 0.951 | 0.695 | $8.05 \times 10^{-8}$ | 0.917 | 0.955 | NLT > NASH-W |
| cg18642567 | <i>RPGRIP1</i>   | 0.951 | 0.722 | $7.52 \times 10^{-8}$ | 0.833 | 1     | NLT > NASH-W |
| cg18690712 | <i>DNAH12</i>    | 0.951 | 0.645 | $1.91 \times 10^{-6}$ | 0.944 | 0.864 | NLT > NASH-W |
| cg19912309 | <i>N/A</i>       | 0.951 | 0.639 | $2.96 \times 10^{-5}$ | 0.917 | 0.864 | NLT > NASH-W |
| cg20414217 | <i>HSD3B2</i>    | 0.951 | 0.616 | $4.64 \times 10^{-8}$ | 0.806 | 1     | NLT > NASH-W |

<sup>a</sup>Probe ID of the Infinium HumanMethylation450 BeadChip. <sup>b</sup>National Center for Biotechnology Information (NCBI) database (Genome Build 37). <sup>c</sup>The Youden index was used as a cutoff value for discriminating NASH-W samples from NLT samples for each probe. <sup>d</sup>Sensitivity was defined as the ratio of the number of tissue samples diagnosed as NASH-W based on the criteria relative to the exact number of the NASH-W samples. <sup>e</sup>Specificity was defined as the ratio of the number of tissue samples not diagnosed as NASH-W based on the criteria relative to the exact number of the NLT samples. <sup>f</sup>NASH-W < NLT: the sample was predicted to be NASH-W and/or carcinogenic risk-positive when its DNA methylation level was lower than the cutoff value; NASH-W > NLT: the sample was predicted to be NASH-W and/or carcinogenic risk-positive when its DNA methylation level was higher than the cutoff value. *N/A*, not annotated (designed in the intergenic regions).

**Additional file 5: Supplementary Table S4** Seventy statistically significant pathway maps in which the 415 probes showing area under the curve (AUC) values more than 0.95 for discrimination of non-cancerous liver tissue samples showing non-alcoholic steatohepatitis from patients with hepatocellular carcinoma (NASH-W) from normal liver tissue (NLT) samples, and were designed for the 339 genes, were significantly ( $P < 0.05$ ) accumulated, as revealed by Reactome pathway analysis (<https://reactome.org>).

| ID            | Description                                                                                               | P        | Involved genes showing AUC values of more than 0.95 for discrimination of MASH-W samples from NLT samples         |
|---------------|-----------------------------------------------------------------------------------------------------------|----------|-------------------------------------------------------------------------------------------------------------------|
| R-HSA-210990  | PECAM1 interactions                                                                                       | 0.000672 | <i>INPP5D, LYN, SRC</i>                                                                                           |
| R-HSA-3247509 | Chromatin modifying enzymes                                                                               | 0.000904 | <i>NSD2, SMARCA4, H2AC13, H2BC13, H3C3, KAT6B, RCOR1, ELP5, MRGBP, EHMT1, H2BC1, H2AC1</i>                        |
| R-HSA-4839726 | Chromatin organization                                                                                    | 0.000904 | <i>NSD2, SMARCA4, H2AC13, H2BC13, H3C3, KAT6B, RCOR1, ELP5, MRGBP, EHMT1, H2BC1, H2AC1</i>                        |
| R-HSA-1632852 | Macroautophagy                                                                                            | 0.001041 | <i>WIPI2, PARK7, CSNK2A1, SRC, PCNT, TOMM20, PRKAG2, WDR45B</i>                                                   |
| R-HSA-3214847 | HATs acetylate histones                                                                                   | 0.001375 | <i>H2AC13, H2BC13, H3C3, KAT6B, ELP5, MRGBP, H2BC1, H2AC1</i>                                                     |
| R-HSA-9663891 | Selective autophagy                                                                                       | 0.001375 | <i>PARK7, CSNK2A1, SRC, PCNT, TOMM20, PRKAG2</i>                                                                  |
| R-HSA-68886   | M Phase                                                                                                   | 0.001629 | <i>PPP2R2D, CKAP5, DCTN1, RCC2, CTDNEP1, CSNK2A1, CLIP1, UBE2I, H2BC13, H3C3, PCNT, RAN, GORASP2, H2BC1, TUBB</i> |
| R-HSA-9612973 | Autophagy                                                                                                 | 0.002030 | <i>WIPI2, PARK7, CSNK2A1, SRC, PCNT, TOMM20, PRKAG2, WDR45B</i>                                                   |
| R-HSA-3214815 | HDACs deacetylate histones                                                                                | 0.002940 | <i>H2AC13, H2BC13, H3C3, RCOR1, H2BC1, H2AC1</i>                                                                  |
| R-HSA-9620244 | Long-term potentiation                                                                                    | 0.005412 | <i>GRIN2A, DLG2, SRC</i>                                                                                          |
| R-HSA-5693565 | Recruitment and ATM-mediated phosphorylation of repair and signaling proteins at DNA double strand breaks | 0.006073 | <i>NSD2, UBE2I, H2BC13, BRCA1, H2BC1</i>                                                                          |
| R-HSA-5693606 | DNA Double Strand Break Response                                                                          | 0.006411 | <i>NSD2, UBE2I, H2BC13, BRCA1, H2BC1</i>                                                                          |
| R-HSA-373752  | Netrin-1 signaling                                                                                        | 0.006715 | <i>NEO1, SRC, PTPNA, MYO10</i>                                                                                    |
| R-HSA-1221632 | Meiotic synapsis                                                                                          | 0.006763 | <i>ACD, UBE2I, H2BC13, BRCA1, H2BC1</i>                                                                           |
| R-HSA-2559582 | Senescence-Associated Secretory Phenotype (SASP)                                                          | 0.006925 | <i>RPS6KA2, CDK6, H2BC13, H3C3, EHMT1, H2BC1</i>                                                                  |
| R-HSA-438064  | Post NMDA receptor activation events                                                                      | 0.007128 | <i>GRIN2A, RPS6KA2, DLG2, SRC, PRKAG2</i>                                                                         |
| R-HSA-1483191 | Synthesis of PC                                                                                           | 0.008382 | <i>PHOSPHO1, CSNK2A1, SLC44A4</i>                                                                                 |
| R-HSA-1500620 | Meiosis                                                                                                   | 0.008863 | <i>ACD, UBE2I, H2BC13, H3C3, BRCA1, H2BC1</i>                                                                     |
| R-HSA-5205647 | Mitophagy                                                                                                 | 0.009247 | <i>CSNK2A1, SRC, TOMM20</i>                                                                                       |
| R-HSA-8934903 | Receptor Mediated Mitophagy                                                                               | 0.011386 | <i>CSNK2A1, SRC</i>                                                                                               |
| R-HSA-442755  | Activation of NMDA receptors and postsynaptic events                                                      | 0.013191 | <i>GRIN2A, RPS6KA2, DLG2, SRC, PRKAG2</i>                                                                         |
| R-HSA-112308  | Presynaptic depolarization and calcium channel opening                                                    | 0.013528 | <i>CACNB3, CACNG2</i>                                                                                             |
| R-HSA-2029481 | FCGR activation                                                                                           | 0.013528 | <i>LYN, SRC</i>                                                                                                   |
| R-HSA-5693567 | HDR through Homologous Recombination (HRR) or Single Strand Annealing (SSA)                               | 0.014844 | <i>NSD2, RAD51B, UBE2I, H2BC13, BRCA1, H2BC1</i>                                                                  |
| R-HSA-1268020 | Mitochondrial protein import                                                                              | 0.015756 | <i>CHCHD7, TOMM20, PMPCA, LDHD</i>                                                                                |
| R-HSA-5693607 | Processing of DNA double-strand break ends                                                                | 0.016240 | <i>NSD2, UBE2I, H2BC13, BRCA1, H2BC1</i>                                                                          |
| R-HSA-5689901 | Metalloprotease DUBs                                                                                      | 0.018015 | <i>H2AC13, BRCA1, H2AC1</i>                                                                                       |
| R-HSA-5693538 | Homology Directed Repair                                                                                  | 0.018108 | <i>NSD2, RAD51B, UBE2I, H2BC13, BRCA1, H2BC1</i>                                                                  |
| R-HSA-5693571 | Nonhomologous End-Joining (NHEJ)                                                                          | 0.020240 | <i>NSD2, H2BC13, BRCA1, H2BC1</i>                                                                                 |
| R-HSA-68875   | Mitotic Prophase                                                                                          | 0.020539 | <i>PPP2R2D, CTDNEP1, H2BC13, H3C3, GORASP2, H2BC1</i>                                                             |
| R-HSA-354194  | GRB2:SOS provides linkage to MAPK signaling for Integrins                                                 | 0.020895 | <i>RAP1B, SRC</i>                                                                                                 |
| R-HSA-372708  | p130Cas linkage to MAPK signaling for integrins                                                           | 0.020895 | <i>RAP1B, SRC</i>                                                                                                 |
| R-HSA-3772470 | Negative regulation of TCF-dependent signaling by WNT ligand antagonists                                  | 0.020895 | <i>LRP5, DKK1</i>                                                                                                 |
| R-HSA-1474165 | Reproduction                                                                                              | 0.021180 | <i>ACD, UBE2I, H2BC13, H3C3, BRCA1, H2BC1</i>                                                                     |
| R-HSA-112315  | Transmission across Chemical Synapses                                                                     | 0.021203 | <i>CACNB3, COMT, GRIN2A, RPS6KA2, DLG2, GABBR1, SRC, CACNG2, PRKAG2</i>                                           |
| R-HSA-380259  | Loss of Nlp from mitotic centrosomes                                                                      | 0.021221 | <i>CKAP5, DCTN1, PCNT, TUBB</i>                                                                                   |
| R-HSA-380284  | Loss of proteins required for interphase microtubule organization from the centrosome                     | 0.021221 | <i>CKAP5, DCTN1, PCNT, TUBB</i>                                                                                   |
| R-HSA-1433559 | Regulation of KIT signaling                                                                               | 0.023647 | <i>LYN, SRC</i>                                                                                                   |
| R-HSA-2730905 | Role of LAT2/NTALLAB on calcium mobilization                                                              | 0.023647 | <i>LYN, LAT2</i>                                                                                                  |
| R-HSA-8854518 | AURKA Activation by TPX2                                                                                  | 0.024338 | <i>CKAP5, DCTN1, PCNT, TUBB</i>                                                                                   |
| R-HSA-1912422 | Pre-NOTCH Expression and Processing                                                                       | 0.024516 | <i>RFNG, H2BC13, H3C3, MAML3, H2BC1</i>                                                                           |
| R-HSA-8934593 | Regulation of RUNX1 Expression and Activity                                                               | 0.026538 | <i>CDK6, SRC</i>                                                                                                  |
| R-HSA-157118  | Signaling by NOTCH                                                                                        | 0.026624 | <i>RFNG, H2BC13, H3C3, SMAD3, HDAC4, IKZF1, MAML3, H2BC1</i>                                                      |
| R-HSA-1839117 | Signaling by cytosolic FGFR1 fusion mutants                                                               | 0.029563 | <i>LRRFIP1, CUX1</i>                                                                                              |
| R-HSA-2559583 | Cellular Senescence                                                                                       | 0.029720 | <i>RPS6KA2, ACD, CDK6, H2BC13, H3C3, EHMT1, H2BC1</i>                                                             |
| R-HSA-5663202 | Diseases of signal transduction by growth factor receptors and second messengers                          | 0.030938 | <i>RAP1B, LYN, DCTN1, LRRFIP1, CUX1, LRP5, SRC, SMAD3, HDAC4, DUSP10, DKK1, MAML3</i>                             |
| R-HSA-9610379 | HCMV Late Events                                                                                          | 0.030981 | <i>H2AC13, H2BC13, H3C3, H2BC1, H2AC1</i>                                                                         |
| R-HSA-3214858 | RMTs methylate histone arginines                                                                          | 0.031367 | <i>SMARCA4, H2AC13, H3C3, H2AC1</i>                                                                               |
| R-HSA-69231   | Cyclin D associated events in G1                                                                          | 0.033724 | <i>LYN, CDK6, SRC</i>                                                                                             |
| R-HSA-69236   | G1 Phase                                                                                                  | 0.033724 | <i>LYN, CDK6, SRC</i>                                                                                             |
| R-HSA-68877   | Mitotic Prometaphase                                                                                      | 0.034953 | <i>CKAP5, DCTN1, RCC2, CSNK2A1, CLIP1, PCNT, TUBB</i>                                                             |
| R-HSA-380270  | Recruitment of mitotic centrosome proteins and complexes                                                  | 0.035284 | <i>CKAP5, DCTN1, PCNT, TUBB</i>                                                                                   |
| R-HSA-380287  | Centrosome maturation                                                                                     | 0.035284 | <i>CKAP5, DCTN1, PCNT, TUBB</i>                                                                                   |
| R-HSA-112314  | Neurotransmitter receptors and postsynaptic signal transmission                                           | 0.035748 | <i>GRIN2A, RPS6KA2, DLG2, GABBR1, SRC, CACNG2, PRKAG2</i>                                                         |
| R-HSA-9013695 | NOTCH4 Intracellular Domain Regulates Transcription                                                       | 0.036001 | <i>SMAD3, MAML3</i>                                                                                               |
| R-HSA-9669938 | Signaling by KIT in disease                                                                               | 0.036001 | <i>LYN, SRC</i>                                                                                                   |
| R-HSA-9670439 | Signaling by phosphorylated juxtamembrane, extracellular and kinase domain KIT mutants                    | 0.036001 | <i>LYN, SRC</i>                                                                                                   |
| R-HSA-5688426 | Deubiquitination                                                                                          | 0.036707 | <i>TNIP2, H2AC13, H2BC13, SMAD3, BRCA1, TOMM20, INO80, H2BC1, H2AC1</i>                                           |
| R-HSA-389513  | CTLA4 inhibitory signaling                                                                                | 0.039404 | <i>LYN, SRC</i>                                                                                                   |
| R-HSA-5620916 | VxPx cargo-targeting to cilium                                                                            | 0.039404 | <i>ARF4, EXOC2</i>                                                                                                |
| R-HSA-9008059 | Interleukin-37 signaling                                                                                  | 0.039404 | <i>PTPN9, SMAD3</i>                                                                                               |
| R-HSA-5693532 | DNA Double-Strand Break Repair                                                                            | 0.040819 | <i>NSD2, RAD51B, UBE2I, H2BC13, BRCA1, H2BC1</i>                                                                  |
| R-HSA-912446  | Meiotic recombination                                                                                     | 0.040930 | <i>H2BC13, H3C3, BRCA1, H2BC1</i>                                                                                 |
| R-HSA-438066  | Unblocking of NMDA receptors, glutamate binding and activation                                            | 0.042923 | <i>GRIN2A, DLG2</i>                                                                                               |
| R-HSA-9613829 | Chaperone Mediated Autophagy                                                                              | 0.042923 | <i>PARK7, PCNT</i>                                                                                                |

|               |                                                                     |          |                                                                                              |
|---------------|---------------------------------------------------------------------|----------|----------------------------------------------------------------------------------------------|
| R-HSA-9617324 | Negative regulation of NMDA receptor-mediated neuronal transmission | 0.042923 | <i>GRIN2A, DLG2</i>                                                                          |
| R-HSA-171306  | Packaging Of Telomere Ends                                          | 0.043546 | <i>ACD, H2BC13, H2BC1</i>                                                                    |
| R-HSA-2565942 | Regulation of PLK1 Activity at G2/M Transition                      | 0.043934 | <i>CKAP5, DCTN1, PCNT, TUBB</i>                                                              |
| R-HSA-449147  | Signaling by Interleukins                                           | 0.046945 | <i>RPS6KA2, RAP1B, INPP5D, LYN, SMARCA4, TNIP2, PTPN9, H3C3, SMAD3, PITPNA, IL20, TOLLIP</i> |
| R-HSA-201722  | Formation of the beta-catenin:TCF transactivating complex           | 0.048667 | <i>SMARCA4, H2BC13, H3C3, H2BC1</i>                                                          |

---

**Additional file 6: Supplementary Table S5** Correlation between levels of DNA methylation and expression for the 13 genes included in Table 2 and for which expression data are available in the The Cancer Genome Atlas database (<https://www.cancer.gov/about-nci/organization/ccg/research/structural-genomics/tcga>).

| Probe ID   | Gene symbol      | <i>P</i>               | Correlation coefficient (r) |
|------------|------------------|------------------------|-----------------------------|
| cg05861743 | <i>APOM*</i>     | 1.35x10 <sup>-29</sup> | -0.533                      |
| cg19861632 | <i>GPR125*</i>   | 1.19x10 <sup>-8</sup>  | -0.286                      |
| cg14950303 | <i>FOXD4L1*</i>  | 2.33x10 <sup>-5</sup>  | 0.214                       |
| cg09580859 | <i>ZC3H3</i>     | 7.68x10 <sup>-4</sup>  | 0.171                       |
| cg14288091 | <i>NIPAL2</i>    | 5.19x10 <sup>-3</sup>  | -0.142                      |
| cg13719443 | <i>LOC285847</i> | 8.21x10 <sup>-3</sup>  | -0.135                      |
| cg26894854 | <i>SLC45A3</i>   | 4.52x10 <sup>-2</sup>  | -0.102                      |
| cg23785719 | <i>STK17A</i>    | 0.12                   | -0.079                      |
| cg26583598 | <i>ZSWIM6</i>    | 0.269                  | -0.057                      |
| cg05393736 | <i>NRBF2</i>     | 0.354                  | 0.047                       |
| cg18210511 | <i>ZC3H3</i>     | 0.664                  | 0.022                       |
| cg22083325 | <i>LOC440461</i> | 0.687                  | -0.021                      |
| cg00431813 | <i>C7orf50</i>   | 0.749                  | 0.016                       |

\*Genes showing *P* values of less than 0.05 and r values of less than -0.2 or more than 0.2.

**Additional file 7: Supplementary Table S6** Comparison of DNA methylation levels based on the Infinium assay between samples of normal healthy liver tissue (GSE107038) deposited in the GEO database (<https://www.ncbi.nlm.nih.gov/geo/query/acc.cgi?acc=GSE107038>) and non-cancerous liver tissue samples showing non-alcoholic steatohepatitis from our cohort of patients with hepatocellular carcinoma (NASH-W).

| Probe ID   | GSE107038 (mean± standard deviation [SD]) |   |       | NASH-W (mean±SD) |   |       | $\Delta\beta_{\text{NASH-W-GSE107038}}$ | <i>P</i> (Welch's <i>t</i> test) |
|------------|-------------------------------------------|---|-------|------------------|---|-------|-----------------------------------------|----------------------------------|
| cg00431813 | 0.452                                     | ± | 0.069 | 0.629            | ± | 0.085 | 0.177                                   | 5.23x10 <sup>-10</sup>           |
| cg04662828 | 0.682                                     | ± | 0.073 | 0.506            | ± | 0.053 | -0.176                                  | 2.27x10 <sup>-15</sup>           |
| cg05393736 | 0.675                                     | ± | 0.049 | 0.749            | ± | 0.039 | 0.074                                   | 3.00x10 <sup>-8</sup>            |
| cg05861743 | 0.717                                     | ± | 0.065 | 0.843            | ± | 0.049 | 0.126                                   | 1.46x10 <sup>-11</sup>           |
| cg08912801 | 0.647                                     | ± | 0.065 | 0.531            | ± | 0.07  | -0.116                                  | 1.03x10 <sup>-7</sup>            |
| cg09580822 | 0.837                                     | ± | 0.076 | 0.599            | ± | 0.109 | -0.239                                  | 1.90x10 <sup>-10</sup>           |
| cg09580859 | 0.609                                     | ± | 0.119 | 0.784            | ± | 0.113 | 0.175                                   | 7.53x10 <sup>-7</sup>            |
| cg11152384 | 0.538                                     | ± | 0.09  | 0.36             | ± | 0.083 | -0.178                                  | 4.69x10 <sup>-10</sup>           |
| cg11820154 | 0.456                                     | ± | 0.056 | 0.546            | ± | 0.054 | 0.09                                    | 1.98x10 <sup>-7</sup>            |
| cg13719443 | 0.462                                     | ± | 0.082 | 0.35             | ± | 0.063 | -0.112                                  | 1.79x10 <sup>-7</sup>            |
| cg14288091 | 0.279                                     | ± | 0.075 | 0.146            | ± | 0.049 | -0.133                                  | 1.33x10 <sup>-11</sup>           |
| cg14950303 | 0.489                                     | ± | 0.043 | 0.583            | ± | 0.045 | 0.094                                   | 6.36x10 <sup>-10</sup>           |
| cg15050398 | 0.752                                     | ± | 0.039 | 0.479            | ± | 0.058 | -0.273                                  | 1.61x10 <sup>-19</sup>           |
| cg16319310 | 0.808                                     | ± | 0.064 | 0.587            | ± | 0.027 | -0.221                                  | 3.33x10 <sup>-26</sup>           |
| cg18210511 | 0.464                                     | ± | 0.076 | 0.603            | ± | 0.078 | 0.14                                    | 2.68x10 <sup>-8</sup>            |
| cg19861632 | 0.512                                     | ± | 0.058 | 0.605            | ± | 0.056 | 0.093                                   | 2.14x10 <sup>-7</sup>            |
| cg22083325 | 0.163                                     | ± | 0.056 | 0.289            | ± | 0.052 | 0.125                                   | 2.16x10 <sup>-11</sup>           |
| cg23785719 | 0.133                                     | ± | 0.028 | 0.319            | ± | 0.043 | 0.186                                   | 2.36x10 <sup>-18</sup>           |
| cg26385097 | 0.504                                     | ± | 0.116 | 0.293            | ± | 0.105 | -0.211                                  | 2.85x10 <sup>-9</sup>            |
| cg26583598 | 0.642                                     | ± | 0.097 | 0.776            | ± | 0.087 | 0.134                                   | 1.12x10 <sup>-6</sup>            |
| cg26894854 | 0.464                                     | ± | 0.051 | 0.54             | ± | 0.052 | 0.075                                   | 2.07x10 <sup>-6</sup>            |

**Additional file 8: Supplementary Table S7** Multivariate analysis using the 91 samples of non-cancerous liver tissue showing non-alcoholic steatohepatitis (NASH) derived from biopsy specimens of patients with morbid obesity but without hepatocellular carcinoma (HCC) (NASH-O samples) and the 22 samples of non-cancerous liver tissue showing NASH derived from partial hepatectomy specimens of patients with HCC (NASH-W samples) in the initial cohorts.

| Probe ID <sup>a</sup> | Independent variable              | Odds ratio <sup>b</sup> | 95% confidence interval | P value <sup>c</sup>        |
|-----------------------|-----------------------------------|-------------------------|-------------------------|-----------------------------|
| cg00431813            | Ballooning <sup>d</sup>           | 5.786                   | 0.132-252.827           | 0.362                       |
|                       | Brunt classification <sup>e</sup> | 0.686                   | 0.275-1.714             | 0.420                       |
|                       | DNA methylation quantification    | 232.059                 | 31.166-1727.915         | <u>1.05x10<sup>-7</sup></u> |
| cg05393736            | Ballooning <sup>d</sup>           | 4.286                   | 0.269-68.340            | 0.303                       |
|                       | Brunt classification <sup>c</sup> | 0.972                   | 0.472-2.001             | 0.938                       |
|                       | DNA methylation quantification    | 44.977                  | 10.934-185.009          | <u>1.33x10<sup>-7</sup></u> |
| cg09580822            | Ballooning <sup>d</sup>           | 1.378                   | 0.124-15.383            | 0.795                       |
|                       | Brunt classification <sup>e</sup> | 0.553                   | 0.248-1.235             | 0.148                       |
|                       | DNA methylation quantification    | 180.610                 | 23.957-1361.603         | <u>4.61x10<sup>-7</sup></u> |
| cg11820154            | Ballooning <sup>d</sup>           | 0.460                   | 0.031-6.765             | 0.571                       |
|                       | Brunt classification <sup>c</sup> | 0.347                   | 0.100-1.207             | 0.096                       |
|                       | DNA methylation quantification    | 1138.492                | 52.740-24576.521        | <u>7.13x10<sup>-6</sup></u> |
| cg14950303            | Ballooning <sup>d</sup>           | 1.256                   | 0.114-13.824            | 0.853                       |
|                       | Brunt classification <sup>c</sup> | 0.702                   | 0.315-1.565             | 0.387                       |
|                       | DNA methylation quantification    | 144.050                 | 21.556- 962.621         | <u>2.92x10<sup>-7</sup></u> |
| cg15050398            | Ballooning <sup>d</sup>           | 7.485                   | 0.656-85.377            | 0.105                       |
|                       | Brunt classification <sup>e</sup> | 1.772                   | 0.873-3.600             | 0.113                       |
|                       | DNA methylation quantification    | 39.410                  | 10.225-151.901          | <u>9.44x10<sup>-8</sup></u> |
| cg23785719            | Ballooning <sup>d</sup>           | 2.288                   | 0.048-109.285           | 0.675                       |
|                       | Brunt classification <sup>e</sup> | 2.717                   | 0.959-7.697             | 0.060                       |
|                       | DNA methylation quantification    | 245.432                 | 30.392-1981.975         | <u>2.42x10<sup>-7</sup></u> |
| cg26583598            | Ballooning <sup>d</sup>           | 0.692                   | 0.051-9.460             | 0.782                       |
|                       | Brunt classification <sup>e</sup> | 0.286                   | 0.090-0.915             | <u>0.035</u>                |
|                       | DNA methylation quantification    | 1035.707                | 54.365-19731.273        | <u>3.89x10<sup>-6</sup></u> |
| cg18210511            | Ballooning <sup>d</sup>           | 8.990                   | 0.219-369.308           | 0.247                       |
|                       | Brunt classification <sup>e</sup> | 0.482                   | 0.207-1.123             | 0.091                       |
|                       | DNA methylation quantification    | 248.725                 | 30.517-2027.198         | <u>2.56x10<sup>-7</sup></u> |
| cg05861743            | Ballooning <sup>d</sup>           | 1.491                   | 0.133-16.687            | 0.746                       |
|                       | Brunt classification <sup>e</sup> | 0.503                   | 0.229-1.106             | 0.088                       |
|                       | DNA methylation quantification    | 190.885                 | 24.574-1482.750         | <u>5.14x10<sup>-7</sup></u> |
| cg14288091            | Ballooning <sup>d</sup>           | 1.606                   | 0.152-16.949            | 0.694                       |
|                       | Brunt classification <sup>e</sup> | 0.759                   | 0.344-1.675             | 0.494                       |



|            |                                   |         |                 |                             |
|------------|-----------------------------------|---------|-----------------|-----------------------------|
|            | DNA methylation quantification    | 99.726  | 16.280-610.913  | <u>6.46x10<sup>-7</sup></u> |
| cg26385097 | Ballooning <sup>d</sup>           | 1.577   | 0.145-17.140    | 0.708                       |
|            | Brunt classification <sup>e</sup> | 0.595   | 0.275-1.288     | 0.188                       |
|            | DNA methylation quantification    | 141.119 | 20.394-976.513  | <u>5.30x10<sup>-7</sup></u> |
| cg22083325 | Ballooning <sup>d</sup>           | 6.795   | 0.307-150.345   | 0.225                       |
|            | Brunt classification <sup>e</sup> | 0.632   | 0.286-1.397     | 0.257                       |
|            | DNA methylation quantification    | 90.209  | 16.093-505.661  | <u>3.07x10<sup>-7</sup></u> |
| cg09580859 | Ballooning <sup>d</sup>           | 9.892   | 0.299-327.815   | 0.200                       |
|            | Brunt classification <sup>e</sup> | 0.506   | 0.226-1.133     | 0.098                       |
|            | DNA methylation quantification    | 180.393 | 24.567-1324.612 | <u>3.27x10<sup>-7</sup></u> |
| cg13719443 | Ballooning <sup>d</sup>           | 1.774   | 0.166-18.957    | 0.635                       |
|            | Brunt classification <sup>e</sup> | 0.609   | 0.278-1.335     | 0.216                       |
|            | DNA methylation quantification    | 120.359 | 17.878-810.272  | <u>8.48x10<sup>-7</sup></u> |
| cg26894854 | Ballooning <sup>d</sup>           | 1.782   | 0.169-18.816    | 0.631                       |
|            | Brunt classification <sup>e</sup> | 0.586   | 0.273-1.261     | 0.172                       |
|            | DNA methylation quantification    | 83.537  | 14.260-489.391  | <u>9.28x10<sup>-7</sup></u> |
| cg04662828 | Ballooning <sup>d</sup>           | 14.655  | 1.172-183.220   | 0.037                       |
|            | Brunt classification <sup>e</sup> | 1.036   | 0.544-1.973     | 0.915                       |
|            | DNA methylation quantification    | 35.014  | 8.406-145.841   | <u>1.04x10<sup>-6</sup></u> |
| cg11152384 | Ballooning <sup>d</sup>           | 1.865   | 0.172-20.186    | 0.608                       |
|            | Brunt classification <sup>e</sup> | 0.528   | 0.248-1.125     | 0.098                       |
|            | DNA methylation quantification    | 140.210 | 19.811-992.306  | <u>7.38x10<sup>-7</sup></u> |
| cg08912801 | Ballooning <sup>d</sup>           | 9.581   | 0.420-218.813   | 0.157                       |
|            | Brunt classification <sup>e</sup> | 0.662   | 0.324-1.352     | 0.258                       |
|            | DNA methylation quantification    | 91.389  | 15.135-551.828  | <u>8.58x10<sup>-7</sup></u> |
| cg16319310 | Ballooning <sup>d</sup>           | 4.220   | 0.268-66.499    | 0.306                       |
|            | Brunt classification <sup>e</sup> | 2.148   | 0.963-4.788     | 0.062                       |
|            | DNA methylation quantification    | 70.412  | 12.597-393.575  | <u>1.26x10<sup>-6</sup></u> |
| cg19861632 | Ballooning <sup>d</sup>           | 2.047   | 0.191-21.929    | 0.554                       |
|            | Brunt classification <sup>e</sup> | 0.610   | 0.302-1.232     | 0.168                       |
|            | DNA methylation quantification    | 207.072 | 20.883-2053.237 | <u>5.20x10<sup>-6</sup></u> |

<sup>a</sup>Probe ID of the Infinium HumanMethylation450 BeadChip. <sup>b</sup>Top 10 CpG sites showing the highest odds ratio of being NASH-W samples are summarized in Table 3. <sup>c</sup>P values less than 0.05 are underlined. <sup>d</sup>Ballooning was evaluated according to the non-alcoholic fatty disease (NAFLD) activity score (NAS) (Ref. 26) <sup>e</sup>Fibrosis stage was defined according to the Brunt classification (Ref. 27).

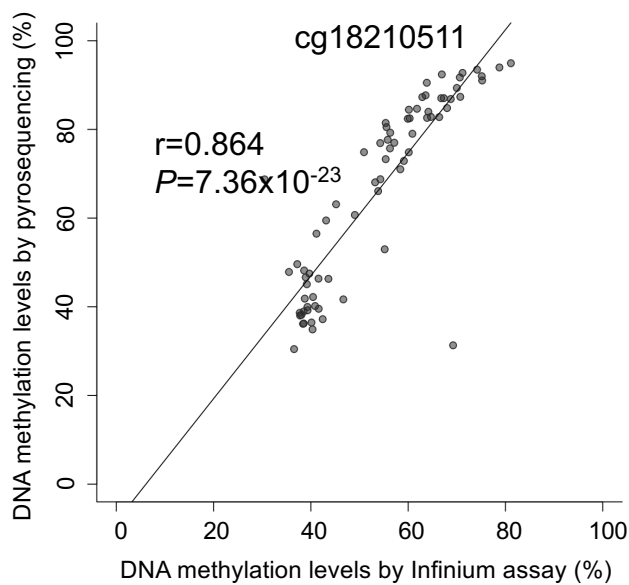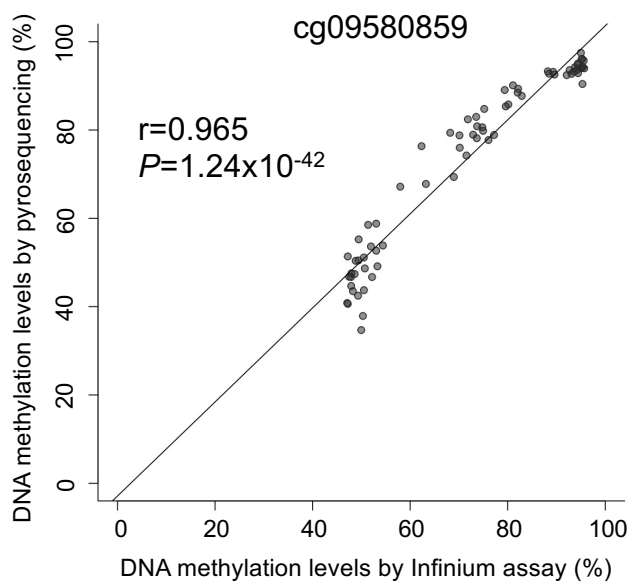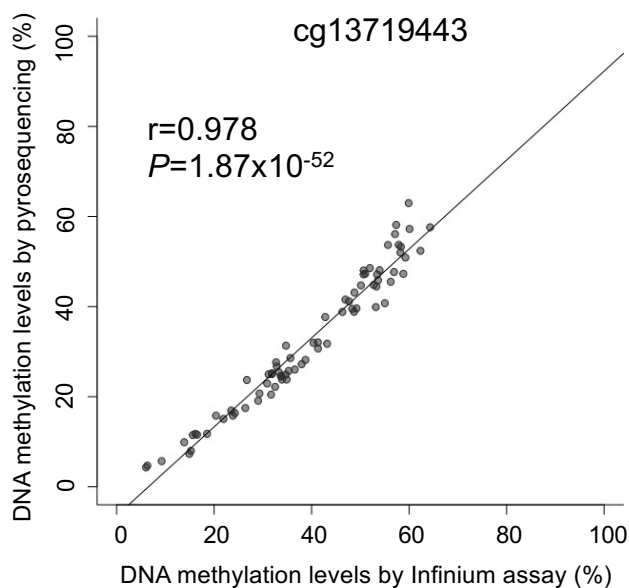

**Additional file 9: Supplementary Figure S2** Correlation between DNA methylation levels based on the Infinium assay and such levels based on pyrosequencing using samples of normal liver tissue (n=34), non-cancerous liver tissue showing non-alcoholic steatohepatitis from partial hepatectomy specimens from patients with hepatocellular carcinoma (n=22), and cancerous tissue samples (n = 22) in the initial cohort. Infinium data were successfully verified by pyrosequencing. ( $P < 7.36 \times 10^{-23}$  and Pearson correlation coefficient [ $r$ ] > 0.864).

**Additional file 10: Supplementary Table S8** Correlation between DNA methylation levels based on the Infinium assay of the 21 marker CpG sites included in Table 2 and obesity in patients with nonalcoholic steatohepatitis (NASH) with and without hepatocellular carcinoma in the initial and validation cohorts.

| Probe ID   | DNA methylation levels based on Infinium assay (mean±standard deviation) |                                     |                                  |
|------------|--------------------------------------------------------------------------|-------------------------------------|----------------------------------|
|            | Non-obese NASH patients (body mass index [BMI]<25) (n=17)                | Obese NASH patients (BMI≥25) (n=22) | <i>P</i> (Welch's <i>t</i> test) |
| cg00431813 | 0.591 ± 0.106                                                            | 0.614 ± 0.109                       | 0.519                            |
| cg04662828 | 0.512 ± 0.045                                                            | 0.503 ± 0.041                       | 0.522                            |
| cg05393736 | 0.725 ± 0.037                                                            | 0.708 ± 0.056                       | 0.240                            |
| cg05861743 | 0.815 ± 0.061                                                            | 0.831 ± 0.055                       | 0.403                            |
| cg08912801 | 0.560 ± 0.078                                                            | 0.528 ± 0.102                       | 0.276                            |
| cg09580822 | 0.617 ± 0.106                                                            | 0.613 ± 0.131                       | 0.923                            |
| cg09580859 | 0.749 ± 0.145                                                            | 0.750 ± 0.138                       | 0.974                            |
| cg11152384 | 0.399 ± 0.099                                                            | 0.359 ± 0.109                       | 0.237                            |
| cg11820154 | 0.524 ± 0.067                                                            | 0.528 ± 0.063                       | 0.877                            |
| cg13719443 | 0.374 ± 0.096                                                            | 0.376 ± 0.11                        | 0.950                            |
| cg14288091 | 0.178 ± 0.071                                                            | 0.160 ± 0.075                       | 0.463                            |
| cg14950303 | 0.560 ± 0.048                                                            | 0.577 ± 0.052                       | 0.302                            |
| cg15050398 | 0.460 ± 0.043                                                            | 0.462 ± 0.052                       | 0.886                            |
| cg16319310 | 0.579 ± 0.019                                                            | 0.575 ± 0.041                       | 0.670                            |
| cg18210511 | 0.583 ± 0.104                                                            | 0.579 ± 0.088                       | 0.901                            |
| cg19861632 | 0.587 ± 0.045                                                            | 0.597 ± 0.061                       | 0.560                            |
| cg22083325 | 0.266 ± 0.042                                                            | 0.282 ± 0.056                       | 0.304                            |
| cg23785719 | 0.313 ± 0.037                                                            | 0.282 ± 0.041                       | 0.016                            |
| cg26385097 | 0.332 ± 0.124                                                            | 0.298 ± 0.136                       | 0.411                            |
| cg26583598 | 0.729 ± 0.107                                                            | 0.727 ± 0.111                       | 0.939                            |
| cg26894854 | 0.525 ± 0.046                                                            | 0.529 ± 0.073                       | 0.854                            |

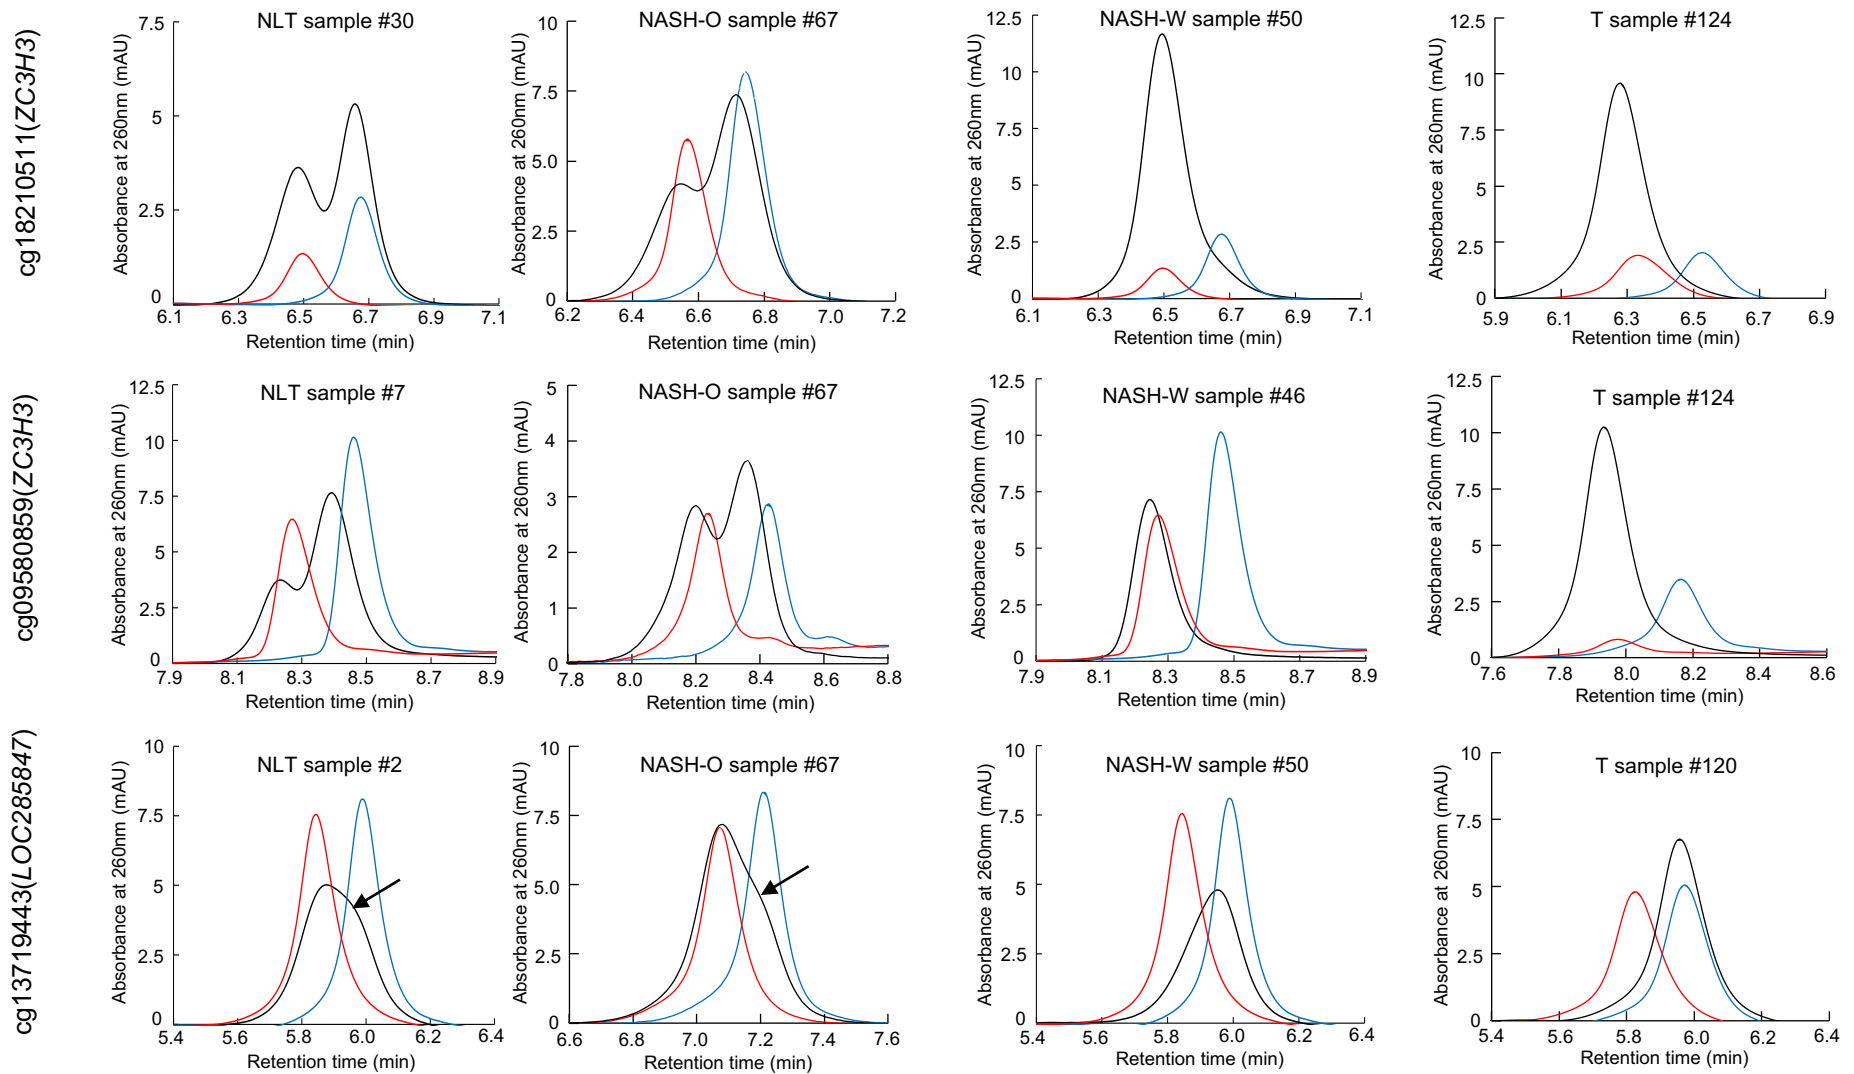

**Additional file 11: Supplementary Figure S3** Representative chromatograms obtained by high-performance liquid chromatography analysis using a newly developed anion-exchange column for marker CpG sites in specimens of normal liver tissue (NLT), non-cancerous liver tissue (N) showing non-alcoholic steatohepatitis (NASH) derived from partial hepatectomy specimens from patients without hepatocellular carcinoma (HCC) (NASH-O), N samples showing NASH from patients with HCC (NASH-W), and cancerous tissue (T) samples. The chromatogram patterns (bimodal peak or single peak with a shoulder [indicated by an arrow]) for most of the NASH-O samples are similar to those for NLT samples, whereas those for T samples (single peak) are similar to those for NASH-W samples.

**Additional file 12: Supplementary Table S9** Correlation between relative methylation rates based on high-performance liquid chromatography (HPLC) and the sex and age of nonalcoholic steatohepatitis (NASH) patients with and without hepatocellular carcinoma in the initial and validation cohorts from whom HPLC data had been obtained (n=34).

| Probe ID   | Correlation with sex                                 |              |                                  | Correlation with age |                                      |
|------------|------------------------------------------------------|--------------|----------------------------------|----------------------|--------------------------------------|
|            | Relative methylation rates (mean±standard deviation) |              | <i>P</i> (Welch's <i>t</i> test) | <i>P</i>             | Correlation coefficient ( <i>r</i> ) |
|            | Male (n=29)                                          | Female (n=5) |                                  |                      |                                      |
| cg18210511 | 83.6 ± 20.3                                          | 100.4 ± 14.1 | 0.0540                           | 0.0994               | 0.287                                |
| cg09580859 | 96.1 ± 17.2                                          | 108.7 ± 11.1 | 0.0663                           | 0.0345               | 0.364                                |
| cg13719443 | 32.4 ± 10.0                                          | 30.6 ± 9.1   | 0.7147                           | 0.6018               | -0.093                               |
